# Supplementary material for: Closely-related taxa influence woody species discrimination via DNA barcoding: evidence from global forest dynamics plots
Source: Springer Nature journal article supplement (doi:10.1038/srep15127), 2015-10-12
Supplement: 41598_2015_BFsrep15127_MOESM1_ESM.pdf [file 41598_2015_BFsrep15127_MOESM1_ESM.pdf]

## Closely-related taxa influence woody species discrimination via DNA barcoding: evidence from global forest dynamics plots

Nancai Pei<sup>1,2\*</sup>, David L. Erickson<sup>3</sup>, Bufeng Chen<sup>1,2</sup>, Xuejun Ge<sup>4</sup>, Xiangcheng Mi<sup>5</sup>, Nathan G. Swenson<sup>6</sup>, Jin-Long Zhang<sup>7</sup>, Frank A. Jones<sup>8</sup>, Chun-Lin Huang<sup>9</sup>, Wanhui Ye<sup>4</sup>, Zhanqing Hao<sup>10</sup>, Chang-Fu Hsieh<sup>11</sup>, Shawn Lum<sup>12</sup>, Norman A. Bourg<sup>13</sup>, John D. Parker<sup>14</sup>, Jess K. Zimmerman<sup>15</sup>, William J. McShea<sup>13</sup>, Ida C. Lopez<sup>3</sup>, I-Fang Sun<sup>16</sup>, Stuart J. Davies<sup>17</sup>, Keping Ma<sup>5</sup> & W. John Kress<sup>3\*</sup>

### Supplementary Table S1

Description of the thirteen forest dynamics plots examined in this study. Totals are for the number of taxa (species and genera) among tropical, subtropical and temperate regions, and all plots united; and the non-redundant totals count each species only once.

| Local/regional/global scales | Coordinates<br>(Latitude/Longitude) | Climatic region | Hemisphere    | Plot size<br>(ha) | Number of<br>species | Number of<br>genus | Number of multiple-species<br>genus ( $\geq 3$ species/genus) | Ratio of multiple-species<br>genus /total genera | Species/genus ratio |
|------------------------------|-------------------------------------|-----------------|---------------|-------------------|----------------------|--------------------|---------------------------------------------------------------|--------------------------------------------------|---------------------|
| Bukit-Tima                   | 1.25/103.75                         | Tropics         | Asia          | 2                 | 132                  | 90                 | 9                                                             | 0.1                                              | 1.466666667         |
| BCI                          | 9.1543/-79.8461                     | Tropics         | Latin America | 50                | 226                  | 140                | 14                                                            | 0.1                                              | 1.614285714         |
| Luquillo                     | 18.3262/-65.816                     | Tropics         | Latin America | 16                | 104                  | 79                 | 6                                                             | 0.075949367                                      | 1.316455696         |
| Nanjenshan                   | 22.059/120.854                      | Subtropics      | Asia          | 3                 | 30                   | 23                 | 1                                                             | 0.043478261                                      | 1.304347826         |
| Dinhushan                    | 23.1558/112.511                     | Subtropics      | Asia          | 20                | 135                  | 85                 | 12                                                            | 0.141176471                                      | 1.588235294         |
| Lienhuachih                  | 23.9136/120.879                     | Subtropics      | Asia          | 25                | 96                   | 56                 | 10                                                            | 0.178571429                                      | 1.714285714         |
| Fushan                       | 24.7614/121.555                     | Subtropics      | Asia          | 25                | 69                   | 44                 | 5                                                             | 0.113636364                                      | 1.568181818         |
| Gutianshan                   | 29.2503/118.119                     | Subtropics      | Asia          | 24                | 91                   | 57                 | 8                                                             | 0.140350877                                      | 1.596491228         |
| SERC                         | 38.889/-76.559                      | Temperate zone  | North America | 16                | 16                   | 12                 | 1                                                             | 0.083333333                                      | 1.333333333         |
| SCBI                         | 38.8916/-78.1457                    | Temperate zone  | North America | 25.6              | 35                   | 20                 | 3                                                             | 0.15                                             | 1.75                |

|                      |                  |                |               |      |     |     |    |              |             |
|----------------------|------------------|----------------|---------------|------|-----|-----|----|--------------|-------------|
| Changbaishan         | 42.3833/128.083  | Temperate zone | Asia          | 25   | 14  | 9   | 1  | 0.1111111111 | 1.555555556 |
| Wabikon-Lake         | 45.5508/-88.7964 | Temperate zone | North America | 25.6 | 10  | 8   | 0  | 0            | 1.25        |
| Wytham-Woods         | 51.7743/-1.3379  | Temperate zone | Europe        | 18   | 8   | 8   | 0  | 0            | 1           |
| Tropics              |                  |                |               |      | 472 | 183 | 38 | 0.207650273  | 2.579234973 |
| Subtropics           |                  |                |               |      | 326 | 153 | 34 | 0.2222222222 | 2.130718954 |
| Temperate zone       |                  |                |               |      | 106 | 52  | 12 | 0.230769231  | 2.038461538 |
| All the plots united |                  |                |               |      | 896 | 428 | 83 | 0.193925234  | 2.093457944 |

## Supplemental Table S2

Names and Accession numbers for all plant species in the study. Listed by presence in CTFS-ForestGEO forest dynamics plots and alphabetically by taxonomy. Items without GenBank accession numbers could be retrievable when queried.

| Taxon                          | Family        | Site         | <i>rbcL</i> | <i>matK</i> | <i>trnH-psbA</i> |
|--------------------------------|---------------|--------------|-------------|-------------|------------------|
| <i>Abarema macradenia</i>      | Fabaceae      | BCI          | GQ981652    | GQ981925    | GQ982133         |
| <i>Abies balsamea</i>          | Pinaceae      | SERC         | KJ593167    | n/a         | n/a              |
| <i>Abies holophylla</i>        | Pinaceae      | Changbaishan | CANGB001-14 | CANGB001-15 | CANGB001-16      |
| <i>Abies nephrolepis</i>       | Pinaceae      | Changbaishan | CANGB002-14 | CANGB002-15 | CANGB002-16      |
| <i>Acalypha diversifolia</i>   | Euphorbiaceae | BCI          | GQ981653    | n/a         | GQ982134         |
| <i>Acalypha macrostachya</i>   | Euphorbiaceae | BCI          | GQ981654    | GQ981926    | GQ982135         |
| <i>Acer barbinerve</i>         | Sapindaceae   | Changbaishan | CANGB003-14 | CANGB003-15 | CANGB003-16      |
| <i>Acer campestre</i>          | Sapindaceae   | Wytham       | KM360609    | FJ395381    | FJ395476         |
| <i>Acer ginnala</i>            | Sapindaceae   | Changbaishan | CANGB004-14 | n/a         | n/a              |
| <i>Acer mandshuricum</i>       | Sapindaceae   | Changbaishan | CANGB005-14 | CANGB005-15 | CANGB005-16      |
| <i>Acer mono</i>               | Sapindaceae   | Changbaishan | CANGB006-14 | CANGB006-15 | CANGB006-16      |
| <i>Acer negundo</i>            | Sapindaceae   | SERC         | HM849738    | EU749281    | DQ006227         |
| <i>Acer olivaceum</i>          | Sapindaceae   | Gutianshan   | HQ427190    | HQ427338    | HQ427032         |
| <i>Acer pseudoplatanus</i>     | Sapindaceae   | Wytham       | HE963306    | n/a         | HE966461         |
| <i>Acer pseudosieboldianum</i> | Sapindaceae   | Changbaishan | CANGB007-14 | CANGB007-15 | CANGB007-16      |
| <i>Acer rubrum</i>             | Sapindaceae   | SERC         | KJ593173    | KJ592831    | HQ266324         |
| <i>Acer saccharum</i>          | Sapindaceae   | SERC         | KJ593174    | EU749290    | EU750438         |
| <i>Acer tegmentosum</i>        | Sapindaceae   | Changbaishan | CANGB008-14 | CANGB008-15 | CANGB008-16      |
| <i>Acer triflorum</i>          | Sapindaceae   | Changbaishan | CANGB009-14 | CANGB009-15 | CANGB009-16      |
| <i>Acer ukurunduense</i>       | Sapindaceae   | Changbaishan | CANGB010-14 | n/a         | n/a              |
| <i>Acer wilsonii</i>           | Sapindaceae   | Gutianshan   | HQ427189    | HQ427337    | HQ427031         |

|                                 |                  |              |          |          |             |
|---------------------------------|------------------|--------------|----------|----------|-------------|
| <i>Acronychia pedunculata</i>   | Rutaceae         | Dinghushan   | HQ415180 | HQ415351 | HQ415529    |
| <i>Actinodaphne malaccensis</i> | Lauraceae        | Bukit-Timah  | KJ594563 | KJ708793 | BTSIN145-13 |
| <i>Adelia triloba</i>           | Euphorbiaceae    | BCI          | GQ981655 | GQ981927 | GQ982136    |
| <i>Adenantha malayana</i>       | Fabaceae         | Bukit-Timah  | KJ594564 | KJ708795 | BTSIN315-13 |
| <i>Adenantha microsperma</i>    | Fabaceae:Mimos.  | Dinghushan   | HQ415090 | HQ415273 | HQ415441    |
| <i>Adinandra dumosa</i>         | Pentaphylacaceae | Bukit-Timah  | Z83149   | KJ708799 | BTSIN588-13 |
| <i>Adinandra integerrima</i>    | Pentaphylacaceae | Bukit-Timah  | n/a      | KJ708801 | BTSIN599-13 |
| <i>Adinandra milletii</i>       | Pentaphylacaceae | Gutianshan   | HQ427223 | HQ427369 | n/a         |
| <i>Aeschynomene americana</i>   | Fabaceae         | Luquillo     | AF30870  | n/a      | n/a         |
| <i>Aglaiia elliptica</i>        | Meliaceae        | Bukit-Timah  | AY128210 | KJ708802 | BTSIN223-13 |
| <i>Aglaiia exstipulata</i>      | Meliaceae        | Bukit-Timah  | KJ594567 | KJ708803 | BTSIN451-13 |
| <i>Aglaiia glabriflora</i>      | Meliaceae        | Bukit-Timah  | KJ594568 | KJ708804 | n/a         |
| <i>Aglaiia rufinervis</i>       | Meliaceae        | Bukit-Timah  | KJ594573 | KJ708809 | BTSIN292-13 |
| <i>Aglaiia sexipetala</i>       | Meliaceae        | Bukit-Timah  | n/a      | KJ708810 | BTSIN647-13 |
| <i>Aidia canthioides</i>        | Rubiaceae        | Dinghushan   | HQ415144 | n/a      | HQ415494    |
| <i>Aidia cochinchinensis</i>    | Rubiaceae        | Gutianshan   | HQ427198 | HQ427347 | HQ427041    |
| <i>Aidia wallichiana</i>        | Rubiaceae        | Bukit-Timah  | KJ594574 | KJ708811 | BTSIN392-13 |
| <i>Alangium longiflorum</i>     | Cornaceae        | Bukit-Timah  | KJ594578 | KJ708815 | BTSIN196-13 |
| <i>Alangium nobile</i>          | Cornaceae        | Bukit-Timah  | KJ594579 | KJ708816 | BTSIN296-13 |
| <i>Albizia julibrissin</i>      | Fabaceae         | SERC         | GU135262 | EU812010 | EU811952    |
| <i>Albizia kalkora</i>          | Fabaceae:Mimos.  | Gutianshan   | HQ427141 | HQ427295 | HQ426986    |
| <i>Albizia splendens</i>        | Fabaceae         | Bukit-Timah  | BT-R01   | KJ708817 | BTSIN198-13 |
| <i>Alchornea costaricensis</i>  | Euphorbiaceae    | BCI          | JQ591406 | n/a      | n/a         |
| <i>Alchornea latifolia</i>      | Euphorbiaceae    | BCI/Luquillo | HM446755 | HM641813 | HM446884    |
| <i>Alchornea trewioides</i>     | Euphorbiaceae    | Dinghushan   | HQ415177 | HQ415348 | HQ415526    |
| <i>Alchorneopsis floribunda</i> | Euphorbiaceae    | Luquillo     | HM446756 | HM446655 | HM446885    |
| <i>Aleurites montana</i>        | Euphorbiaceae    | Lienhuachih  | KJ687971 | KJ687450 | KJ686651    |
| <i>Alfaropsis roxburghiana</i>  | Juglandaceae     | Dinghushan   | HQ415111 | HQ415289 | HQ415461    |
| <i>Alibertia edulis</i>         | Rubiaceae        | BCI          | GQ981657 | GQ981930 | GQ982139    |
| <i>Allophylus</i>               | Sapindaceae      | BCI          | GQ981658 | JQ589126 | GQ982140    |

|                                              |                  |                     |             |             |             |
|----------------------------------------------|------------------|---------------------|-------------|-------------|-------------|
| <i>psilospermus</i>                          |                  |                     |             |             |             |
| <i>Alniphyllum fortunei</i>                  | Styracaceae      | Gutianshan          | HQ427122    | HQ427279    | HQ426969    |
| <i>Alniphyllum pterospermum</i>              | Styracaceae      | Fushan              | KJ687974    | n/a         | n/a         |
| <i>Alnus incana</i>                          | Betulaceae       | Wabikon Lake        | KJ593202    | KJ592842    | FJ011870    |
| <i>Alnus mandshurica</i>                     | Betulaceae       | Changbaishan        | CANGB011-14 | CANGB011-15 | CANGB011-16 |
| <i>Alphonsea johorensis</i>                  | Annonaceae       | Bukit-Timah         | BT-R02      | KJ708818    | BTSIN323-13 |
| <i>Alseis blackiana</i>                      | Rubiaceae        | BCI                 | GQ981659    | n/a         | GQ982141    |
| <i>Amaioua corymbosa</i>                     | Rubiaceae        | BCI                 | GQ981660    | GQ981931    | GQ982142    |
| <i>Amelanchier arborea</i>                   | Rosaceae         | SERC                | JQ391252    | JQ390935    | JQ390642    |
| <i>Amelanchier laevis</i>                    | Rosaceae         | Wabikon Lake        | HQ589949    | n/a         | n/a         |
| <i>Anacardium excelsum</i>                   | Anacardiaceae    | BCI                 | GQ981661    | GQ981932    | GQ982143    |
| <i>Anaxagorea panamensis</i>                 | Annonaceae       | BCI                 | GQ981662    | GQ981933    | GQ982144    |
| <i>Andira inermis</i>                        | Fabaceae:Papil.  | BCI/Luquillo        | HM446757    | GQ429072    | HM446886    |
| <i>Anisoptera laevis</i>                     | Dipterocarpaceae | Bukit-Timah         | KJ594582    | AB006370    | BTSIN070-13 |
| <i>Anisoptera megistocarpa</i>               | Dipterocarpaceae | Bukit-Timah         | KJ594584    | KJ708822    | BTSIN034-13 |
| <i>Annona acuminata</i>                      | Annonaceae       | BCI                 | GQ981664    | GQ981934    | GQ982146    |
| <i>Annona purpurea</i>                       | Annonaceae       | BCI                 | JQ590160    | JQ586490    | n/a         |
| <i>Annona spraguei</i>                       | Annonaceae       | BCI                 | GQ981665    | GQ981935    | GQ982147    |
| <i>Antiaris toxicaria</i>                    | Moraceae         | Bukit-Timah         | KJ594588    | GQ434236    | BTSIN053-13 |
| <i>Antidesma bunius</i>                      | Phyllanthaceae   | Dinghushan          | HQ415206    | n/a         | HQ415553    |
| <i>Antidesma coriaceum</i>                   | Phyllanthaceae   | Bukit-Timah         | KJ594590    | n/a         | BTSIN089-13 |
| <i>Antidesma japonicum var. acutisepalum</i> | Phyllanthaceae   | Fushan/Lien huachih | AB925514    | n/a         | KJ686654    |
| <i>Antidesma japonicum var. densiflorum</i>  | Phyllanthaceae   | Fushan              | KJ687977    | n/a         | KJ686655    |
| <i>Antidesma neurocarpum</i>                 | Phyllanthaceae   | Bukit-Timah         | KJ594591    | KJ708824    | n/a         |
| <i>Antidesma venosum</i>                     | Phyllanthaceae   | Dinghushan          | HQ415207    | HQ415372    | HQ415554    |
| <i>Antirhea obtusifolia</i>                  | Rubiaceae        | Luquillo            | HM446758    | HM446656    | HM446887    |

|                                                  |                      |                       |          |          |             |
|--------------------------------------------------|----------------------|-----------------------|----------|----------|-------------|
| <i>Apeiba membranacea</i>                        | Malvaceae            | BCI                   | GQ981666 | n/a      | n/a         |
| <i>Apeiba tibourbou</i>                          | Malvaceae            | BCI                   | GQ981667 | GQ981936 | GQ982148    |
| <i>Aphelandra sinclairiana</i>                   | Acanthaceae          | BCI                   | GQ981668 | GQ981937 | GQ982149    |
| <i>Aporusa benthamiana</i>                       | Phyllanthaceae       | Bukit-Timah           | KJ594594 | KJ708826 | BTSIN200-13 |
| <i>Aporusa falcifera</i>                         | Phyllanthaceae       | Bukit-Timah           | KJ594596 | n/a      | n/a         |
| <i>Aporusa frutescens</i>                        | Phyllanthaceae       | Bukit-Timah           | KJ594599 | KJ708827 | BTSIN457-13 |
| <i>Aporusa lunatum</i>                           | Phyllanthaceae       | Bukit-Timah           | KJ594600 | KJ708829 | n/a         |
| <i>Aporusa miqueliana</i>                        | Phyllanthaceae       | Bukit-Timah           | KJ594603 | KJ708831 | BTSIN469-13 |
| <i>Aporusa nervosa</i>                           | Phyllanthaceae       | Bukit-Timah           | KJ594605 | n/a      | BTSIN235-13 |
| <i>Aquilaria sinensis</i>                        | Thymelaeaceae        | Dinghushan            | HQ415056 | HQ415244 | HQ415408    |
| <i>Aralia chinensis</i>                          | Araliaceae           | Gutianshan            | HQ427250 | HQ427393 | HQ427093    |
| <i>Aralia decaisneana</i>                        | Araliaceae           | Fushan                | KJ687982 | KJ687454 | KJ686659    |
| <i>Aralia spinifolia</i>                         | Araliaceae           | Dinghushan            | HQ415059 | HQ415247 | HQ415411    |
| <i>Archidendron clypearia</i>                    | Fabaceae             | Bukit-Timah           | n/a      | KJ708833 | n/a         |
| <i>Archidendron lucidum</i>                      | Fabaceae-Mimosoideae | Dinghushan/<br>Fushan | HQ415101 | HQ415282 | HQ415452    |
| <i>Archidendron turgidum</i>                     | Fabaceae             | Dinghushan            | HQ415094 | n/a      | HQ415445    |
| <i>Ardisia bartlettii</i>                        | Primulaceae          | BCI                   | GQ981669 | GQ981938 | GQ982150    |
| <i>Ardisia colorata</i>                          | Primulaceae          | Bukit-Timah           | KJ594606 | KJ708834 | BTSIN262-13 |
| <i>Ardisia cornudentata subsp. morrisonensis</i> | Primulaceae          | Fushan                | KJ687988 | n/a      | n/a         |
| <i>Ardisia crenata</i>                           | Primulaceae          | Gutianshan/<br>Fushan | HQ427270 | HQ427412 | HQ427113    |
| <i>Ardisia glauca</i>                            | Primulaceae          | Luquillo              | KJ082123 | KJ012464 | HM446888    |
| <i>Ardisia guianensis</i>                        | Primulaceae          | BCI                   | GQ981670 | GQ981939 | GQ982151    |
| <i>Ardisia quinquegona</i>                       | Primulaceae          | Dinghushan/<br>Fushan | HQ415236 | HQ415400 | HQ415582    |
| <i>Ardisia sieboldii</i>                         | Primulaceae          | Fushan                | KJ688696 | KJ687459 | KJ686669    |
| <i>Ardisia standleyana</i>                       | Primulaceae          | BCI                   | GQ981671 | GQ981940 | GQ982152    |
| <i>Ardisia teysmanniana</i>                      | Primulaceae          | Bukit-Timah           | KJ594608 | n/a      | BTSIN368-13 |
| <i>Ardisia virens</i>                            | Primulaceae          | Fushan                | KJ687998 | KJ687460 | KJ686673    |
| <i>Arthrophyllum diversifolium</i>               | Araliaceae           | Bukit-Timah           | KJ594609 | KJ708836 | n/a         |
| <i>Artocarpus altilis</i>                        | Moraceae             | Luquillo              | HM446760 | HM446658 | HM446889    |
| <i>Artocarpus anisophyllus</i>                   | Moraceae             | Bukit-Timah           | KJ594612 | n/a      | BTSIN155-13 |

|                                    |                |              |             |             |             |
|------------------------------------|----------------|--------------|-------------|-------------|-------------|
| <i>Artocarpus dadah</i>            | Moraceae       | Bukit-Timah  | KJ594613    | n/a         | BTSIN170-13 |
| <i>Artocarpus elasticus</i>        | Moraceae       | Bukit-Timah  | KJ594614    | KJ708837    | BTSIN424-13 |
| <i>Artocarpus hispidus</i>         | Moraceae       | Bukit-Timah  | BT-R03      | KJ708839    | BTSIN440-13 |
| <i>Artocarpus integer</i>          | Moraceae       | Bukit-Timah  | KJ594617    | KJ708840    | BTSIN466-13 |
| <i>Artocarpus kemandu</i>          | Moraceae       | Bukit-Timah  | KJ594618    | KJ708841    | n/a         |
| <i>Artocarpus lowii</i>            | Moraceae       | Bukit-Timah  | KJ594620    | KJ708843    | BT-P01      |
| <i>Artocarpus scortechinii</i>     | Moraceae       | Bukit-Timah  | KJ594622    | KJ708845    | BTSIN212-13 |
| <i>Artocarpus styracifolius</i>    | Moraceae       | Dinghushan   | HQ415055    | HQ415243    | HQ415407    |
| <i>Asimina triloba</i>             | Annonaceae     | SERC         | L12631      | GQ139722    | GQ139861    |
| <i>Aspidosperma spruceanum</i>     | Apocynaceae    | BCI          | GQ981672    | GQ981941    | GQ982153    |
| <i>Astrocaryum standleyanum</i>    | Arecaceae      | BCI          | GQ981673    | GQ981942    | GQ982154    |
| <i>Astronium graveolens</i>        | Anacardiaceae  | BCI          | GQ981674    | JQ586470    | GQ982155    |
| <i>Attalea rostrata</i>            | Arecaceae      | BCI          | GQ981675    | GQ981943    | GQ982156    |
| <i>Aucuba chinensis</i>            | Garryaceae     | Lienhuachih  | KJ688006    | KJ687468    | KJ686681    |
| <i>Baccaurea macrocarpa</i>        | Phyllanthaceae | Bukit-Timah  | KJ594624    | KJ708847    | BTSIN437-13 |
| <i>Bactris barronis</i>            | Arecaceae      | BCI          | GQ981676    | GQ981944    | GQ982157    |
| <i>Bactris coloniata</i>           | Arecaceae      | BCI          | GQ981677    | n/a         | GQ982158    |
| <i>Bactris major</i>               | Arecaceae      | BCI          | GQ981678    | GQ981945    | GQ982159    |
| <i>Beilschmiedia erythrophloia</i> | Lauraceae      | Lienhuachih  | KJ688008    | n/a         | KJ686684    |
| <i>Beilschmiedia kunstleri</i>     | Lauraceae      | Bukit-Timah  | BT-R04      | KJ708848    | BT-P02      |
| <i>Beilschmiedia pendula</i>       | Lauraceae      | Luquillo     | GQ981679    | EU153826    | EU153945    |
| <i>Betula alleghaniensis</i>       | Betulaceae     | Wabikon Lake | KJ593243    | KJ592868    | EU750442    |
| <i>Betula costata</i>              | Betulaceae     | Changbaishan | CANGB012-14 | n/a         | n/a         |
| <i>Betula ermanii</i>              | Betulaceae     | Changbaishan | CANGB013-14 | n/a         | n/a         |
| <i>Betula papyrifera</i>           | Betulaceae     | Wabikon Lake | KJ593244    | KJ592869    | FJ011880    |
| <i>Betula platyphylla</i>          | Betulaceae     | Changbaishan | CANGB014-14 | CANGB014-15 | CANGB014-16 |
| <i>Bhesa robusta</i>               | Celastraceae   | Bukit-Timah  | KJ594626    | KJ708849    | BT-P03      |
| <i>Bischofia javanica</i>          | Phyllanthaceae | Lienhuachih  | AY663571    | AY552420    | n/a         |

|                                 |                |                       |          |          |             |
|---------------------------------|----------------|-----------------------|----------|----------|-------------|
| <i>Blastus cochinchinensis</i>  | Lamiaceae      | Dinghushan/<br>Fushan | KJ688010 | HQ415241 | KJ686685    |
| <i>Borojoa panamensis</i>       | Rubiaceae      | BCI                   | GQ981680 | GQ981946 | GQ982161    |
| <i>Brackenridgea hookeri</i>    | Ochnaceae      | Bukit-Timah           | KJ594629 | n/a      | BTSIN432-13 |
| <i>Bridelia retusa</i>          | Phyllanthaceae | Dinghushan            | HQ415195 | HQ415363 | HQ415543    |
| <i>Bridelia tomentosa</i>       | Phyllanthaceae | Lienhuachih           | KJ688016 | n/a      | n/a         |
| <i>Brosimum alicastrum</i>      | Moraceae       | BCI                   | GQ981681 | GQ981947 | GQ982162    |
| <i>Brosimum guianense</i>       | Moraceae       | BCI                   | GQ981682 | GQ981948 | GQ982163    |
| <i>Brunfelsia portoricensis</i> | Solanaceae     | Luquillo              | HM446761 | HM446659 | HM446890    |
| <i>Buchenavia tetraphylla</i>   | Combretaceae   | Luquillo              | HM446762 | HM446660 | HM446891    |
| <i>Bunchosia nitida</i>         | Malpighiaceae  | BCI                   | n/a      | KJ012484 | KJ426629    |
| <i>Byrsonima spicata</i>        | Malpighiaceae  | Luquillo              | HM446763 | HM446661 | HM446892    |
| <i>Byrsonima wadsworthii</i>    | Malpighiaceae  | Luquillo              | HM446764 | HM446662 | HM446893    |
| <i>Callicarpa bodinieri</i>     | Verbenaceae    | Gutianshan            | HQ427182 | HQ427330 | HQ427023    |
| <i>Callicarpa formosana</i>     | Verbenaceae    | Lienhuachih           | JQ618473 | KP093632 | JQ618420    |
| <i>Callicarpa giraldii</i>      | Verbenaceae    | Gutianshan            | HQ427184 | HQ427332 | HQ427025    |
| <i>Callicarpa kochiana</i>      | Verbenaceae    | Fushan                | KJ688022 | KJ687476 | KJ686695    |
| <i>Callicarpa rubella</i>       | Verbenaceae    | Gutianshan            | HQ427181 | HQ427329 | HQ427022    |
| <i>Callicarpa tikusikensis</i>  | Verbenaceae    | Fushan                | KJ688027 | KJ687481 | KJ686700    |
| <i>Calophyllum calaba</i>       | Clusiaceae     | Luquillo              | HM446765 | n/a      | HM446894    |
| <i>Calophyllum incrassatum</i>  | Clusiaceae     | Bukit-Timah           | KJ594633 | n/a      | BTSIN456-13 |
| <i>Calophyllum longifolium</i>  | Clusiaceae     | BCI                   | GQ981683 | HQ331555 | GQ982164    |
| <i>Calophyllum macrocarpum</i>  | Clusiaceae     | Bukit-Timah           | KJ594637 | n/a      | n/a         |
| <i>Calophyllum membranaceum</i> | Clusiaceae     | Dinghushan            | HQ415099 | n/a      | HQ415450    |
| <i>Calophyllum pulcherrimum</i> | Clusiaceae     | Bukit-Timah           | KJ594635 | n/a      | n/a         |
| <i>Calophyllum teysmannii</i>   | Clusiaceae     | Bukit-Timah           | KJ594636 | HQ331560 | BTSIN197-13 |
| <i>Calophyllum wallichianum</i> | Clusiaceae     | Bukit-Timah           | KJ594637 | n/a      | n/a         |



|                                 |                 |             |          |          |             |
|---------------------------------|-----------------|-------------|----------|----------|-------------|
| <i>Calycogonium squamulosum</i> | Melastomataceae | Luquillo    | HM446766 | n/a      | HM446895    |
| <i>Camellia chekiang oleosa</i> | Theaceae        | Gutianshan  | HQ427229 | HQ427374 | HQ427072    |
| <i>Camellia cuspidata</i>       | Theaceae        | Gutianshan  | HQ427225 | HQ427370 | HQ427068    |
| <i>Camellia fraterna</i>        | Theaceae        | Gutianshan  | HQ427224 | n/a      | n/a         |
| <i>Camellia furfuracea</i>      | Theaceae        | Lienhuachih | KJ688031 | KJ687485 | KJ686704    |
| <i>Camellia nokoensis</i>       | Theaceae        | Lienhuachih | KJ688034 | KJ687486 | KJ686705    |
| <i>Camellia salicifolia</i>     | Theaceae        | Lienhuachih | KJ688037 | n/a      | KJ686707    |
| <i>Camnosperma auriculatum</i>  | Anacardiaceae   | Bukit-Timah | KJ594639 | KJ708854 | BTSIN249-13 |
| <i>Canarium album</i>           | Burseraceae     | Dinghushan  | HQ415083 | HQ415266 | HQ415434    |
| <i>Canarium littorale</i>       | Burseraceae     | Bukit-Timah | FJ466633 | KJ708855 | BTSIN606-13 |
| <i>Canarium pilosum</i>         | Burseraceae     | Bukit-Timah | KJ594640 | KJ708856 | AY635378    |
| <i>Canarium tramdenum</i>       | Burseraceae     | Dinghushan  | HQ415084 | HQ415267 | HQ415435    |
| <i>Canthium confertum</i>       | Rubiaceae       | Bukit-Timah | n/a      | n/a      | BTSIN144-13 |
| <i>Canthium glabrum</i>         | Rubiaceae       | Bukit-Timah | KJ594641 | n/a      | BTSIN035-13 |
| <i>Canthium horridum</i>        | Rubiaceae       | Dinghushan  | HQ415226 | HQ415390 | HQ415572    |
| <i>Capparis frondosa</i>        | Capparaceae     | BCI         | GQ981684 | GQ981949 | GQ982165    |
| <i>Carallia brachiata</i>       | Rhizophoraceae  | Dinghushan  | HQ415233 | HQ415397 | HQ415579    |
| <i>Carpinus betulus</i>         | Betulaceae      | Wytham      | JN893226 | JN895396 | FJ011833    |
| <i>Carpinus caroliniana</i>     | Betulaceae      | SERC        | KJ593289 | KJ592883 | AY211430    |
| <i>Carpinus viminea</i>         | Betulaceae      | Gutianshan  | HQ427161 | n/a      | n/a         |
| <i>Carya cordiformis</i>        | Juglandaceae    | SERC        | KJ593294 | KJ592887 | HQ596633    |
| <i>Carya glabra</i>             | Juglandaceae    | SERC        | L12637   | KF201333 | KF201453    |
| <i>Carya laciniosa</i>          | Juglandaceae    | SCBI        | n/a      | n/a      | KF201451    |
| <i>Carya ovalis</i>             | Juglandaceae    | SCBI        | L12637   | n/a      | KF201453    |
| <i>Carya tomentosa</i>          | Juglandaceae    | SERC        | n/a      | AF118039 | KF201458    |
| <i>Caryota maxima</i>           | Arecaceae       | Dinghushan  | HQ415227 | HQ415391 | HQ415573    |
| <i>Caryota mitis</i>            | Arecaceae       | Bukit-Timah | KJ594645 | KJ708860 | JF345055    |
| <i>Casearia aculeata</i>        | Salicaceae      | BCI         | GQ981685 | GQ981950 | GQ982166    |
| <i>Casearia arborea</i>         | Flacourtiaceae  | Luquillo    | GQ981686 | HM446663 | HM446896    |
| <i>Casearia commersoniana</i>   | Salicaceae      | BCI         | GQ981687 | GQ981952 | GQ982168    |
| <i>Casearia glomerata</i>       | Salicaceae      | Dinghushan  | HQ415115 | HQ415293 | HQ415465    |
| <i>Casearia guianensis</i>      | Salicaceae      | BCI         | HM446767 | GQ981953 | HM446897    |
| <i>Casearia membranacea</i>     | Flacourtiaceae  | Fushan      | KJ688042 | KJ687490 | KJ686709    |
| <i>Casearia sylvestris</i>      | Flacourtiaceae  | Luquillo    | HM446768 | HM446664 | HM446898    |
| <i>Casearia velutina</i>        | Salicaceae      | Dinghushan  | HQ415116 | HQ415294 | HQ415466    |

|                                                   |                |                            |          |          |             |
|---------------------------------------------------|----------------|----------------------------|----------|----------|-------------|
| <i>Cassipourea elliptica</i>                      | Rhizophoraceae | BCI                        | GQ981690 | GQ981955 | GQ982171    |
| <i>Cassipourea guianensis</i>                     | Rhizophoraceae | Luquillo                   | HM446769 | HM446665 | HM446899    |
| <i>Castanea dentata</i>                           | Fagaceae       | SCBI                       | KF613012 | n/a      | JQ677929    |
| <i>Castanea mollissima</i>                        | Fagaceae       | SERC                       | HQ336406 | U92862   | HQ336406    |
| <i>Castanea sativa</i>                            | Fagaceae       | Wytham                     | M94936   | n/a      | FN687510    |
| <i>Castanopsis carlesii</i>                       | Fagaceae       | Gutianshan                 | HQ427175 | HQ427323 | HQ427016    |
| <i>Castanopsis chinensis</i>                      | Fagaceae       | Dinghushan                 | HQ415235 | HQ415399 | HQ415581    |
| <i>Castanopsis cuspidata</i> var. <i>carlesii</i> | Fagaceae       | Fushan                     | KJ688046 | KJ687491 | KJ686711    |
| <i>Castanopsis eyrei</i>                          | Fagaceae       | Gutianshan                 | HQ427167 | HQ427315 | HQ427008    |
| <i>Castanopsis fargesii</i>                       | Fagaceae       | Gutianshan/<br>Lienhuachih | KJ688056 | KJ687501 | KJ686721    |
| <i>Castanopsis fissa</i>                          | Fagaceae       | Dinghushan                 | HQ415234 | HQ415398 | HQ415580    |
| <i>Castanopsis kawakamii</i>                      | Fagaceae       | Lienhuachih                | KJ688057 | KJ687503 | KJ686723    |
| <i>Castanopsis lucida</i>                         | Fagaceae       | Bukit-Timah                | KJ594649 | KJ708864 | BTSIN101-13 |
| <i>Castanopsis tibetana</i>                       | Fagaceae       | Gutianshan                 | HQ427172 | HQ427320 | HQ427013    |
| <i>Catunaregam spinosa</i>                        | Rubiaceae      | Dinghushan                 | HQ415178 | HQ415349 | HQ415527    |
| <i>Cavanillesia platanifolia</i>                  | Malvaceae      | BCI                        | GQ981691 | GQ981956 | GQ982172    |
| <i>Cecropia insignis</i>                          | Urticaceae     | BCI                        | GQ981692 | JQ589383 | GQ982173    |
| <i>Cecropia longipes</i>                          | Urticaceae     | BCI                        | GQ981693 | GQ981957 | GQ982174    |
| <i>Cecropia obtusifolia</i>                       | Urticaceae     | BCI                        | GQ981694 | GQ981958 | GQ982175    |
| <i>Cecropia schreberiana</i>                      | Urticaceae     | Luquillo                   | HM446770 | HM446666 | HM446900    |
| <i>Cedrela odorata</i>                            | Meliaceae      | BCI                        | GQ981695 | GQ981959 | GQ982176    |
| <i>Ceiba pentandra</i>                            | Bombacaceae    | Luquillo                   | GQ981696 | GQ981960 | GQ982177    |
| <i>Celtis biondii</i>                             | Ulmaceae       | Gutianshan                 | HQ427254 | n/a      | n/a         |
| <i>Celtis formosana</i>                           | Cannabaceae    | Lienhuachih                | KJ688060 | n/a      | KJ686725    |
| <i>Celtis occidentalis</i>                        | Cannabaceae    | SERC                       | JX571800 | n/a      | n/a         |
| <i>Celtis schippii</i>                            | Cannabaceae    | BCI                        | GQ981697 | GQ981961 | GQ982178    |
| <i>Cespedesia spathulata</i>                      | Ochnaceae      | BCI                        | GQ981698 | n/a      | GQ982179    |
| <i>Cestrum macrophyllum</i>                       | Solanaceae     | Luquillo                   | HM446771 | HM446667 | HM446901    |

|                                                             |                |             |          |          |             |
|-------------------------------------------------------------|----------------|-------------|----------|----------|-------------|
| <i>Cestrum megalophyllum</i>                                | Solanaceae     | BCI         | JQ594113 | n/a      | GQ982180    |
| <i>Chamaedorea tepejilote</i>                               | Arecaceae      | BCI         | GQ981699 | GQ981962 | GQ982181    |
| <i>Chamguava schippii</i>                                   | Myrtaceae      | BCI         | n/a      | GQ981963 | GQ982182    |
| <i>Chimarrhis parviflora</i>                                | Rubiaceae      | BCI         | GQ981700 | GQ981964 | GQ982183    |
| <i>Chimonanthus salicifolius</i>                            | Calycanthaceae | Gutianshan  | HQ427177 | HQ427325 | HQ427018    |
| <i>Chionanthus domingensis</i>                              | Oleaceae       | Luquillo    | HM446772 | n/a      | HM446902    |
| <i>Chionanthus virginicus</i>                               | Oleaceae       | SCBI        | DQ006108 | KJ772654 | DQ006204    |
| <i>Chisocheton sarawakanus</i>                              | Meliaceae      | Bukit-Timah | KJ594652 | KJ708867 | BTSIN650-13 |
| <i>Chrysochlamys eclipes</i>                                | Clusiaceae     | BCI         | GQ981702 | HQ331570 | GQ982184    |
| <i>Chrysophyllum argenteum</i>                              | Sapotaceae     | Luquillo    | HM446773 | HM446668 | HM446904    |
| <i>Chrysophyllum cainito</i>                                | Sapotaceae     | BCI         | GQ981701 | GQ981966 | GQ982186    |
| <i>Chrysophyllum lanceolatum</i>                            | Sapotaceae     | Dinghushan  | HQ415117 | HQ415295 | HQ415467    |
| <i>Chrysophyllum lanceolatum</i> var. <i>stellatocarpon</i> | Sapotaceae     | Dinghushan  | HQ415117 | HQ415295 | HQ415467    |
| <i>Cinnamomum austrosinense</i>                             | Lauraceae      | Fushan      | KJ688061 | n/a      | KJ686727    |
| <i>Cinnamomum camphora</i>                                  | Lauraceae      | Lienhuachih | KJ688064 | KJ510888 | KJ686728    |
| <i>Cinnamomum chekiangense</i>                              | Lauraceae      | Gutianshan  | HQ427267 | HQ427409 | HQ427110    |
| <i>Cinnamomum elongatum</i>                                 | Lauraceae      | Luquillo    | HM446774 | HM446669 | HM446905    |
| <i>Cinnamomum micranthum</i>                                | Lauraceae      | Fushan      | KJ688068 | KJ687507 | KJ686732    |
| <i>Cinnamomum montanum</i>                                  | Lauraceae      | Luquillo    | HM446775 | HM446670 | HM446906    |
| <i>Cinnamomum osmophloeum</i>                               | Lauraceae      | Lienhuachih | KJ688073 | KJ687512 | KJ686737    |
| <i>Cinnamomum sintoc</i>                                    | Lauraceae      | Bukit-Timah | KJ594654 | n/a      | BTSIN326-13 |
| <i>Cinnamomum subavenium</i>                                | Lauraceae      | Gutianshan  | HQ427266 | HQ427408 | HQ427109    |

|                                  |                  |             |          |          |          |
|----------------------------------|------------------|-------------|----------|----------|----------|
| <i>Cinnamomum triplinerve</i>    | Lauraceae        | BCI         | GQ981703 | GQ981967 | GQ982187 |
| <i>Citharexylum caudatum</i>     | Verbenaceae      | Luquillo    | HM446776 | HM446671 | HM446907 |
| <i>Citharexylum fruticosum</i>   | Verbenaceae      | Luquillo    | HM446777 | HM446672 | HM446908 |
| <i>Citrus paradisi</i>           | Rutaceae         | Luquillo    | HM446778 | n/a      | HM446909 |
| <i>Clerodendron trichotomum</i>  | Lamiaceae        | Gutianshan  | HQ427186 | n/a      | n/a      |
| <i>Clerodendrum cyrtophyllum</i> | Lamiaceae        | Lienhuachih | KJ688085 | KJ687521 | KJ686745 |
| <i>Clerodendrum fortunatum</i>   | Lamiaceae        | Dinghushan  | HQ415230 | HQ415394 | HQ415576 |
| <i>Clerodendrum japonicum</i>    | Lamiaceae        | Dinghushan  | HQ415231 | HQ415395 | HQ415577 |
| <i>Clerodendrum trichotomum</i>  | Lamiaceae        | Lienhuachih | KJ688086 | KJ687522 | KJ686746 |
| <i>Cleyera japonica</i>          | Pentaphylacaceae | Fushan      | KJ688091 | KJ687527 | KJ686751 |
| <i>Clibadium erosum</i>          | Asteraceae       | Luquillo    | HM446779 | HM446673 | HM446910 |
| <i>Clidemia dentata</i>          | Melastomataceae  | BCI         | GQ981704 | n/a      | GQ982188 |
| <i>Clidemia octona</i>           | Melastomataceae  | BCI         | GQ981705 | n/a      | GQ982189 |
| <i>Clidemia septuplinervia</i>   | Melastomataceae  | BCI         | GQ981706 | GQ981968 | GQ982190 |
| <i>Clusia rosea</i>              | Clusiaceae       | Luquillo    | HM446780 | HQ331583 | HM446911 |
| <i>Coccoloba coronata</i>        | Polygonaceae     | BCI         | GQ981707 | GQ981969 | GQ982191 |
| <i>Coccoloba diversifolia</i>    | Polygonaceae     | Luquillo    | HM446781 | HM446674 | HM446912 |
| <i>Coccoloba manzinellensis</i>  | Polygonaceae     | BCI         | GQ981708 | GQ981970 | GQ982192 |
| <i>Coccoloba pyrifolia</i>       | Polygonaceae     | Luquillo    | KJ082215 | HM446675 | HM446913 |
| <i>Coffea arabica</i>            | Rubiaceae        | Luquillo    | HM446782 | HM446676 | HM446914 |
| <i>Cojoba rufescens</i>          | Fabaceae         | BCI         | GQ981709 | GQ981971 | GQ982193 |
| <i>Colubrina glandulosa</i>      | Rhamnaceae       | BCI         | JQ593576 | n/a      | n/a      |
| <i>Comocladia glabra</i>         | Anacardiaceae    | Luquillo    | HM446783 | HM446677 | HM446915 |
| <i>Conostegia bracteata</i>      | Melastomataceae  | BCI         | GQ981710 | n/a      | GQ982194 |
| <i>Conostegia cinnamomea</i>     | Melastomataceae  | BCI         | GQ981711 | n/a      | GQ982195 |
| <i>Cordia alliodora</i>          | Boraginaceae     | BCI         | GQ981712 | GQ981972 | GQ982196 |
| <i>Cordia bicolor</i>            | Boraginaceae     | BCI         | GQ981713 | GQ981973 | GQ982197 |
| <i>Cordia borinquensis</i>       | Boraginaceae     | Luquillo    | HM446784 | HM446678 | HM446916 |

|                                   |                 |                  |             |             |             |
|-----------------------------------|-----------------|------------------|-------------|-------------|-------------|
| <i>Cordia lasiocalyx</i>          | Boraginaceae    | BCI              | GQ981714    | n/a         | GQ982198    |
| <i>Cordia sulcata</i>             | Boraginaceae    | Luquillo         | n/a         | HM446679    | HM446917    |
| <i>Cornus alternifolia</i>        | Cornaceae       | Wabikon<br>Lake  | KJ593329    | KJ592907    | JF321212    |
| <i>Cornus florida</i>             | Cornaceae       | SERC             | EU002276    | EU002175    | GQ998105    |
| <i>Corylopsis glandulifera</i>    | Hamamelidaceae  | Gutianshan       | HQ427165    | n/a         | n/a         |
| <i>Corylus avellana</i>           | Betulaceae      | Wytham           | AY263929    | AY263916    | FJ011848    |
| <i>Corylus cornuta</i>            | Betulaceae      | Wabikon<br>Lake  | KJ593340    | KJ592915    | FJ011850    |
| <i>Corylus mandshurica</i>        | Betulaceae      | Changbaisha<br>n | CANGB015-14 | CANGB015-15 | CANGB015-16 |
| <i>Coussarea curvigemma</i>       | Rubiaceae       | BCI              | GQ981715    | GQ981974    | GQ982199    |
| <i>Coutarea hexandra</i>          | Rubiaceae       | BCI              | GQ981716    | GQ981975    | GQ982200    |
| <i>Craibiodendron scleranthum</i> | Ericaceae       | Dinghushan       | HQ415118    | HQ415296    | HQ415468    |
| <i>Crataegus maximowiczii</i>     | Rosaceae        | Changbaisha<br>n | CANGB016-14 | CANGB016-15 | CANGB016-16 |
| <i>Crataegus monogyna</i>         | Rosaceae        | Wytham           | KC251347    | KC251105    | HG764982    |
| <i>Cratoxylum arborescens</i>     | Clusiaceae      | Bukit-Timah      | KJ594656    | HQ331586    | BTSIN454-13 |
| <i>Cratoxylum cochinchinense</i>  | Clusiaceae      | Dinghushan       | HQ415110    | HQ331587    | HQ415460    |
| <i>Cratoxylum formosum</i>        | Clusiaceae      | Bukit-Timah      | KJ594660    | FJ670022    | BTSIN131-13 |
| <i>Croton billbergianus</i>       | Euphorbiaceae   | BCI              | GQ981717    | JQ58744     | GQ982201    |
| <i>Croton lachnocarpus</i>        | Euphorbiaceae   | Dinghushan       | HQ415051    | HQ415239    | HQ415403    |
| <i>Croton laevifolius</i>         | Euphorbiaceae   | Bukit-Timah      | KJ594661    | KJ708871    | BTSIN276-13 |
| <i>Croton poecilanthus</i>        | Euphorbiaceae   | Luquillo         | HM446785    | HM446680    | HM446917    |
| <i>Crypteronia griffithii</i>     | Crypteroniaceae | Bukit-Timah      | KJ594662    | KJ708872    | BTSIN447-13 |
| <i>Cryptocarya chinensis</i>      | Lauraceae       | Fushan           | KJ688094    | KJ687529    | KJ686754    |
| <i>Cryptocarya concinna</i>       | Lauraceae       | Nanjenshan       | KJ688716    | KJ687907    | KJ687311    |
| <i>Cryptocarya ferrea</i>         | Lauraceae       | Bukit-Timah      | KJ594663    | n/a         | n/a         |
| <i>Cryptocarya nitens</i>         | Lauraceae       | Bukit-Timah      | BT-R05      | KJ708873    | BT-P04      |
| <i>Cryptocarya nitens</i>         | Lauraceae       | Bukit-Timah      | n/a         | KJ708873    | n/a         |

|                                     |                  |             |          |          |             |
|-------------------------------------|------------------|-------------|----------|----------|-------------|
| <i>Cryptocarya rugulosa</i>         | Lauraceae        | Bukit-Timah | KJ594663 | n/a      | BTSIN122-13 |
| <i>Cunninghamia lanceolata</i>      | Cupressaceae     | Gutianshan  | HQ427238 | HQ427381 | HQ427081    |
| <i>Cupania cinerea</i>              | Sapindaceae      | BCI         | GQ981718 | GQ981976 | GQ982202    |
| <i>Cupania latifolia</i>            | Sapindaceae      | BCI         | GQ981719 | GQ981977 | GQ982203    |
| <i>Cupania rufescens</i>            | Sapindaceae      | BCI         | GQ981720 | GQ981978 | GQ982204    |
| <i>Cupania seemannii</i>            | Sapindaceae      | BCI         | GQ981721 | GQ981979 | GQ982205    |
| <i>Cyathea arborea</i>              | Cyatheaceae      | Luquillo    | HM446786 | n/a      | HM446918    |
| <i>Cyathea borinquena</i>           | Cyatheaceae      | Luquillo    | HM446787 | n/a      | HM446919    |
| <i>Cyathea lepifera</i>             | Cyatheaceae      | Fushan      | KJ688102 | n/a      | KJ686762    |
| <i>Cyathea petiolata</i>            | Cyatheaceae      | BCI         | EF463164 | n/a      | n/a         |
| <i>Cyathea podophylla</i>           | Cyatheaceae      | Fushan      | KJ688103 | n/a      | KJ686763    |
| <i>Cyathea spinulosa</i>            | Cyatheaceae      | Fushan      | KJ688108 | n/a      | KJ686769    |
| <i>Cyathocalyx ramuliflorus</i>     | Annonaceae       | Bukit-Timah | KJ594665 | KJ708874 | BTSIN246-13 |
| <i>Cyclobalanopsis gilva</i>        | Fagaceae         | Fushan      | KJ688109 | KJ687534 | KJ686770    |
| <i>Cyclobalanopsis glauca</i>       | Fagaceae         | Gutianshan  | AB060571 | HQ427316 | HQ427009    |
| <i>Cyclobalanopsis gracilis</i>     | Fagaceae         | Gutianshan  | HQ427176 | n/a      | n/a         |
| <i>Cyclobalanopsis longinix</i>     | Fagaceae         | Fushan      | KJ688116 | KJ687541 | KJ686777    |
| <i>Cyclobalanopsis myrsinifolia</i> | Fagaceae         | Gutianshan  | HQ427170 | HQ427317 | HQ427010    |
| <i>Cyclobalanopsis pachyloma</i>    | Fagaceae         | Lienhuachih | KJ688117 | KJ687542 | KJ686778    |
| <i>Cyclobalanopsis sessilifolia</i> | Fagaceae         | Fushan      | KJ688121 | n/a      | n/a         |
| <i>Cyrilla racemiflora</i>          | Cyrillaceae      | Luquillo    | HM446788 | HM446681 | HM446920    |
| <i>Dacryodes costata</i>            | Burseraceae      | Bukit-Timah | BT-R06   | KJ708876 | BTSIN618-13 |
| <i>Dacryodes excelsa</i>            | Burseraceae      | Luquillo    | HM446789 | AY594465 | HM446921    |
| <i>Dacryodes laxa</i>               | Burseraceae      | Bukit-Timah | KJ594667 | n/a      | BTSIN080-13 |
| <i>Dacryodes nervosa</i>            | Burseraceae      | Bukit-Timah | KJ594668 | KJ708877 | n/a         |
| <i>Dalbergia hupeana</i>            | Fabaceae: Papil. | Gutianshan  | HQ427142 | HQ427296 | HQ426987    |
| <i>Daphniphyllum oldhamii</i>       | Daphniphyllaceae | Dinghushan  | HQ427162 | HQ427311 | HQ427004    |
| <i>Daphnopsis philippiana</i>       | Thymelaeaceae    | Luquillo    | HM446790 | HM446682 | HM446922    |
| <i>Dehaasia cuneata</i>             | Lauraceae        | Bukit-Timah | AB925315 | AJ24716  | BTSIN229-13 |
| <i>Dendrobenthamia japonica</i>     | Cornaceae        | Gutianshan  | HQ427237 | HQ427380 | n/a         |

|                                                    |                  |              |             |          |             |
|----------------------------------------------------|------------------|--------------|-------------|----------|-------------|
| <i>Dendropanax arboreus</i>                        | Araliaceae       | Luquillo     | HM446791    | HM446683 | HM446923    |
| <i>Dendropanax dentiger</i>                        | Araliaceae       | Gutianshan   | HQ427251    | HQ427394 | HQ427094    |
| <i>Desmopsis panamensis</i>                        | Annonaceae       | BCI          | GQ981723    | GQ981981 | GQ982207    |
| <i>Deutzia parviflora</i><br><i>var. amurensis</i> | Hydrangeaceae    | Changbaishan | CANGB017-14 | n/a      | n/a         |
| <i>Dialium indum</i>                               | Fabaceae         | Bukit-Timah  | KJ594669    | n/a      | BTSIN013-13 |
| <i>Dillenia excelsa</i>                            | Dilleniaceae     | Bukit-Timah  | KJ594670    | KJ708879 | BTSIN287-13 |
| <i>Dillenia grandifolia</i>                        | Dilleniaceae     | Bukit-Timah  | KJ594671    | n/a      | BTSIN207-13 |
| <i>Dillenia suffruticosa</i>                       | Dilleniaceae     | Bukit-Timah  | FJ860354    | KJ708881 | BTSIN634-13 |
| <i>Dimocarpus longan</i>                           | Sapindaceae      | Dinghushan   | HQ415124    | HQ415302 | HQ415474    |
| <i>Diospyros artanthifolia</i>                     | Ebenaceae        | BCI          | GQ981724    | GQ981982 | GQ982208    |
| <i>Diospyros clavigera</i>                         | Ebenaceae        | Bukit-Timah  | n/a         | KJ708885 | BTSIN630-13 |
| <i>Diospyros confusa</i>                           | Ebenaceae        | Bukit-Timah  | KJ594674    | KJ708887 | BTSIN478-13 |
| <i>Diospyros confusa</i>                           | Ebenaceae        | Bukit-Timah  | KJ594674    | KJ708887 | BTSIN478-13 |
| <i>Diospyros coriacea</i>                          | Ebenaceae        | Bukit-Timah  | BT-R07      | KJ708889 | BT-P05      |
| <i>Diospyros eriantha</i>                          | Ebenaceae        | Lienhuachih  | KJ688132    | KJ687552 | KJ686790    |
| <i>Diospyros glaucifolia</i>                       | Ebenaceae        | Gutianshan   | HQ427239    | HQ427382 | HQ427082    |
| <i>Diospyros maingayi</i>                          | Ebenaceae        | Bukit-Timah  | KJ594677    | KJ708892 | BTSIN032-13 |
| <i>Diospyros morrisiana</i>                        | Ebenaceae        | Fushan       | KJ688138    | HQ415354 | KJ686794    |
| <i>Diospyros pilosanthera</i>                      | Ebenaceae        | Bukit-Timah  | KJ594678    | KJ708893 | BTSIN405-13 |
| <i>Diospyros styraciformis</i>                     | Ebenaceae        | Bukit-Timah  | KJ594680    | KJ708898 | BTSIN002-13 |
| <i>Diospyros venosa</i>                            | Ebenaceae        | Bukit-Timah  | KJ594681    | KJ708900 | BT-P06      |
| <i>Diospyros virginiana</i>                        | Ebenaceae        | SCBI         | EU980774    | DQ924064 | FJ238227    |
| <i>Diplospora dubia</i>                            | Rubiaceae        | Dinghushan   | HQ427201    | HQ427350 | HQ415437    |
| <i>Dipterocarpus caudatus</i>                      | Dipterocarpaceae | Bukit-Timah  | KJ594683    | KJ708904 | BTSIN234-13 |
| <i>Dipterocarpus cf kunstleri</i>                  | Dipterocarpaceae | Bukit-Timah  | KJ594684    | n/a      | BTSIN337-13 |
| <i>Dipterocarpus cornutus</i>                      | Dipterocarpaceae | Bukit-Timah  | BT-R08      | KJ708905 | BTSIN046-13 |
| <i>Dipterocarpus sublamellatus</i>                 | Dipterocarpaceae | Bukit-Timah  | BT-R09      | KJ708906 | BTSIN579-13 |
| <i>Dipterocarpus tempehes</i>                      | Dipterocarpaceae | Bukit-Timah  | KJ594685    | KJ708907 | BTSIN051-13 |

|                                   |                |                 |             |          |             |
|-----------------------------------|----------------|-----------------|-------------|----------|-------------|
| <i>Dipteryx oleifera</i>          | Fabaceae       | BCI             | GQ981725    | GQ981983 | GQ982209    |
| <i>Dirca palustris</i>            | Thymelaeaceae  | Wabikon<br>Lake | KJ593370    | KJ592930 | n/a         |
| <i>Distyliopsis dunnii</i>        | Hamamelidaceae | Lienhuachih     | KJ688140    | n/a      | KJ686627    |
| <i>Distylium myricoides</i>       | Hamamelidaceae | Gutianshan      | HQ427166    | n/a      | n/a         |
| <i>Dittia myricoides</i>          | Euphorbiaceae  | Luquillo        | HM446792    | HM446684 | HM446924    |
| <i>Dracaena maingayi</i>          | Liliaceae      | Bukit-Timah     | KJ594686    | n/a      | BTSIN016-13 |
| <i>Drypetes alba</i>              | Euphorbiaceae  | Luquillo        | HM446793    | n/a      | HM446925    |
| <i>Drypetes glauca</i>            | Euphorbiaceae  | Luquillo        | HM446794    | n/a      | HM446926    |
| <i>Drypetes longifolia</i>        | Putranjivaceae | Bukit-Timah     | KJ594687    | n/a      | BTSIN270-13 |
| <i>Drypetes pendula</i>           | Putranjivaceae | Bukit-Timah     | KJ594688    | n/a      | n/a         |
| <i>Durio griffithii</i>           | Malvaceae      | Bukit-Timah     | n/a         | KJ708908 | BTSIN435-13 |
| <i>Durio singaporensis</i>        | Malvaceae      | Bukit-Timah     | KJ594689    | KJ708910 | BT-P07      |
| <i>Dysoxylum cyrtobotryum</i>     | Meliaceae      | Bukit-Timah     | KJ594692    | KJ708913 | BTSIN426-13 |
| <i>Ehretia acuminata</i>          | Boraginaceae   | Gutianshan      | HQ427271    | HQ427413 | HQ427114    |
| <i>Ehretia longiflora</i>         | Boraginaceae   | Fushan          | KJ688142    | KJ687554 | KJ686796    |
| <i>Elaeagnus umbellata</i>        | Elaeagnaceae   | SCBI            | HM849968    | HM851107 | HQ596679    |
| <i>Elaeis oleifera</i>            | Arecaceae      | BCI             | GQ981726    | HQ265568 | GQ982210    |
| <i>Elaeocarpus chinensis</i>      | Elaeocarpaceae | Gutianshan      | HQ427153    | HQ427304 | HQ426997    |
| <i>Elaeocarpus ferrugineus</i>    | Elaeocarpaceae | Bukit-Timah     | KJ594695    | n/a      | BTSIN409-13 |
| <i>Elaeocarpus floribundus</i>    | Elaeocarpaceae | Bukit-Timah     | KJ594696    | KJ708916 | BTSIN428-13 |
| <i>Elaeocarpus japonicus</i>      | Elaeocarpaceae | Fushan          | KJ688145    | KJ687556 | KJ686799    |
| <i>Elaeocarpus nitentifolius</i>  | Elaeocarpaceae | Dinghushan      | HQ415078    | HQ415262 | HQ415429    |
| <i>Elaeocarpus petiolatus</i>     | Elaeocarpaceae | Bukit-Timah     | KJ594700    | KJ708920 | BTSIN414-13 |
| <i>Elaeocarpus polystachyus</i>   | Elaeocarpaceae | Bukit-Timah     | n/a         | KJ708921 | n/a         |
| <i>Elaeocarpus sylvestris</i>     | Elaeocarpaceae | Dinghushan      | HQ415081    | HQ415265 | HQ415432    |
| <i>Eleutherococcus senticosus</i> | Araliaceae     | Changbaishan    | CANGB018-14 | n/a      | n/a         |
| <i>Ellipanthus tomentosus</i>     | Connaraceae    | Bukit-Timah     | KJ594701    | KJ708922 | BT-P08      |
| <i>Endiandra maingayi</i>         | Lauraceae      | Bukit-Timah     | BT-R10      | KJ708924 | BTSIN652-13 |



|                                   |                  |              |             |          |             |
|-----------------------------------|------------------|--------------|-------------|----------|-------------|
| <i>Enkianthus quinqueflorus</i>   | Ericaceae        | Dinghushan   | HQ415063    | HQ415251 | HQ415415    |
| <i>Enterolobium schomburgkii</i>  | Fabaceae         | BCI          | GQ981727    | GQ981984 | GQ982211    |
| <i>Eriobotrya deflexa</i>         | Rosaceae         | Fushan       | KJ688166    | JQ391008 | KJ686818    |
| <i>Erythrina costaricensis</i>    | Fabaceae         | BCI          | n/a         | GQ981985 | GQ982212    |
| <i>Erythrophleum fordii</i>       | Fabaceae:Papil.  | Dinghushan   | HQ415085    | HQ415268 | HQ415436    |
| <i>Erythroxyllum macrophyllum</i> | Erythroxyllaceae | BCI          | GQ981728    | GQ981986 | GQ982213    |
| <i>Erythroxyllum panamense</i>    | Erythroxyllaceae | BCI          | GQ981729    | GQ981987 | GQ982214    |
| <i>Eugenia coloradoensis</i>      | Myrtaceae        | BCI          | GQ981730    | GQ981988 | GQ982215    |
| <i>Eugenia domingensis</i>        | Myrtaceae        | Luquillo     | HM446795    | HM446685 | HM446927    |
| <i>Eugenia eggersii</i>           | Myrtaceae        | Luquillo     | HM446796    | HM446686 | HM446928    |
| <i>Eugenia galalonensis</i>       | Myrtaceae        | BCI          | GQ981731    | n/a      | n/a         |
| <i>Eugenia nesiotica</i>          | Myrtaceae        | BCI          | GQ981732    | GQ981989 | GQ982216    |
| <i>Eugenia oerstediana</i>        | Myrtaceae        | BCI          | GQ981733    | GQ981990 | n/a         |
| <i>Eugenia stahlia</i>            | Myrtaceae        | Luquillo     | HM446797    | HM446687 | HM446929    |
| <i>Euonymus carnosus</i>          | Celastraceae     | Gutianshan   | HQ427246    | HQ427389 | HQ427089    |
| <i>Euonymus laxiflorus</i>        | Celastraceae     | Lienhuachih  | KJ688171    | KJ687571 | KJ686824    |
| <i>Euonymus myrianthus</i>        | Celastraceae     | Gutianshan   | HQ427245    | HQ427388 | HQ427088    |
| <i>Euonymus nitidus</i>           | Celastraceae     | Dinghushan   | HQ427248    | HQ427391 | HQ415545    |
| <i>Euonymus oblongifolius</i>     | Celastraceae     | Gutianshan   | HQ427248    | HQ427391 | n/a         |
| <i>Euonymus phellomana</i>        | Celastraceae     | Changbaishan | CANGB019-14 | n/a      | n/a         |
| <i>Euonymus tashiroi</i>          | Celastraceae     | Lienhuachih  | KJ688172    | KJ687572 | KJ686825    |
| <i>Euonymus verrucosus</i>        | Celastraceae     | Changbaishan | CANGB020-14 | n/a      | n/a         |
| <i>Eurya chinensis</i>            | Pentaphylacaceae | Dinghushan   | HQ415122    | HQ415300 | HQ415472    |
| <i>Eurya loquaiiana</i>           | Pentaphylacaceae | Fushan       | KJ688176    | KJ687578 | KJ686830    |
| <i>Eurya macartneyi</i>           | Pentaphylacaceae | Dinghushan   | HQ415121    | HQ415299 | HQ415471    |
| <i>Eurya muricata</i>             | Pentaphylacaceae | Gutianshan   | HQ427228    | HQ427373 | HQ427071    |
| <i>Eurya rubiginosa</i>           | Pentaphylacaceae | Gutianshan   | HQ427222    | HQ427368 | HQ427065    |
| <i>Eurycoma longifolia</i>        | Simaroubaceae    | Bukit-Timah  | KJ594704    | KJ708926 | BTSIN269-13 |
| <i>Euscaphis japonica</i>         | Staphyleaceae    | Gutianshan   | HQ427180    | HQ427328 | HQ427021    |
| <i>Eustigma balansae</i>          | Hamamelidaceae   | Dinghushan   | HQ415214    | HQ415379 | HQ415561    |

|                                     |                |              |          |          |             |
|-------------------------------------|----------------|--------------|----------|----------|-------------|
| <i>Eustigma oblongifolium</i>       | Hamamelidaceae | Lienhuachih  | KJ688184 | KJ687581 | KJ686839    |
| <i>Evodia fauceaii</i>              | Rutaceae       | Gutianshan   | KF912881 | n/a      | n/a         |
| <i>Fagraea fragrans</i>             | Gentianaceae   | Bukit-Timah  | KJ594706 | n/a      | n/a         |
| <i>Fagus grandifolia</i>            | Fagaceae       | SERC         | KJ593410 | KJ592948 | HQ596698    |
| <i>Fagus sylvatica</i>              | Fagaceae       | Wytham       | JN641795 | JN895059 | FN687511    |
| <i>Fareamea occidentalis</i>        | Rubiaceae      | Luquillo     | HM446798 | HM446688 | HM446930    |
| <i>Ficus ampelas</i>                | Moraceae       | Lienhuachih  | KJ688186 | JQ773505 | KJ686841    |
| <i>Ficus bullenei</i>               | Moraceae       | BCI          | GQ981735 | GQ981991 | GQ982218    |
| <i>Ficus citrifolia</i>             | Moraceae       | Luquillo     | HM446799 | HM446689 | HM446931    |
| <i>Ficus costaricana</i>            | Moraceae       | BCI          | GQ981737 | GQ981993 | GQ982220    |
| <i>Ficus crassinervia</i>           | Moraceae       | Luquillo     | HM446800 | HM446690 | HM446932    |
| <i>Ficus erecta</i>                 | Moraceae       | Gutianshan   | HQ427220 | n/a      | n/a         |
| <i>Ficus erecta var. beecheyana</i> | Moraceae       | Fushan       | KJ688187 | KJ687582 | KJ686842    |
| <i>Ficus fistulosa</i>              | Moraceae       | Lienhuachih  | KJ688191 | n/a      | KJ686845    |
| <i>Ficus formosana</i>              | Moraceae       | Fushan       | KJ688197 | KJ687585 | KJ686851    |
| <i>Ficus grossularioides</i>        | Moraceae       | Bukit-Timah  | KJ594707 | KJ708927 | n/a         |
| <i>Ficus insipida</i>               | Moraceae       | BCI          | GQ981738 | GQ981994 | GQ982221    |
| <i>Ficus lamponga</i>               | Moraceae       | Bukit-Timah  | n/a      | n/a      | BTSIN132-13 |
| <i>Ficus maxima</i>                 | Moraceae       | BCI          | GQ981739 | GQ981995 | GQ982222    |
| <i>Ficus nervosa</i>                | Moraceae       | Lienhuachih  | KJ688206 | KJ687592 | KJ686860    |
| <i>Ficus pandurata</i>              | Moraceae       | Dinghushan   | HQ415153 | HQ415327 | HQ415503    |
| <i>Ficus popenoei</i>               | Moraceae       | BCI          | GQ981741 | GQ981997 | GQ982224    |
| <i>Ficus scortechinii</i>           | Moraceae       | Bukit-Timah  | n/a      | KJ708928 | n/a         |
| <i>Ficus sintenisii</i>             | Moraceae       | Luquillo     | HM446801 | HM446691 | HM446933    |
| <i>Ficus sinuata</i>                | Moraceae       | Bukit-Timah  | KJ594709 | KJ708929 | BTSIN461-13 |
| <i>Ficus superba</i>                | Moraceae       | Dinghushan   | HQ415150 | HQ415324 | HQ415500    |
| <i>Ficus superba var. japonica</i>  | Moraceae       | Fushan       | KJ688208 | n/a      | n/a         |
| <i>Ficus tonduzii</i>               | Moraceae       | BCI          | GQ981742 | GQ981998 | GQ982225    |
| <i>Ficus trigonata</i>              | Moraceae       | BCI          | GQ981743 | n/a      | GQ982226    |
| <i>Ficus variegata</i>              | Moraceae       | Dinghushan   | HQ415154 | n/a      | n/a         |
| <i>Ficus yoponensis</i>             | Moraceae       | BCI          | GQ981744 | GQ981999 | GQ982227    |
| <i>Flacourtia rukam</i>             | Salicaceae     | Bukit-Timah  | n/a      | JF738593 | BTSIN626-13 |
| <i>Flueggea virosa</i>              | Phyllanthaceae | Dinghushan   | HQ415223 | HQ415387 | HQ415569    |
| <i>Fraxinus americana</i>           | Oleaceae       | Wabikon Lake | KJ593422 | KJ592959 | HQ596701    |
| <i>Fraxinus excelsior</i>           | Oleaceae       | Wytham       | FJ862056 | FJ395414 | FJ395513    |
| <i>Fraxinus insularis</i>           | Oleaceae       | Gutianshan   | HQ427187 | HQ427335 | HQ427029    |

|                                   |                |              |             |             |             |
|-----------------------------------|----------------|--------------|-------------|-------------|-------------|
| <i>Fraxinus mandshurica</i>       | Oleaceae       | Changbaishan | CANGB021-14 | CANGB021-15 | CANGB021-16 |
| <i>Fraxinus nigra</i>             | Oleaceae       | Wabikon Lake | KJ593423    | KJ592960    | HQ596702    |
| <i>Fraxinus pennsylvanica</i>     | Oleaceae       | SERC         | HQ590104    | HQ593301    | HQ596703    |
| <i>Gaertnera grisea</i>           | Rubiaceae      | Bukit-Timah  | n/a         | AM117227    | BTSIN639-13 |
| <i>Galearia fulva</i>             | Pandaceae      | Bukit-Timah  | KJ594713    | KJ708930    | BT-P09      |
| <i>Galearia maingayi</i>          | Pandaceae      | Bukit-Timah  | KJ594714    | KJ708931    | n/a         |
| <i>Garcinia atroviridis</i>       | Clusiaceae     | Bukit-Timah  | KJ594716    | n/a         | BTSIN004-13 |
| <i>Garcinia eugenifolia</i>       | Clusiaceae     | Bukit-Timah  | KJ594720    | n/a         | n/a         |
| <i>Garcinia forbesii</i>          | Clusiaceae     | Bukit-Timah  | KJ594717    | n/a         | BTSIN418-13 |
| <i>Garcinia hombroniana</i>       | Clusiaceae     | Bukit-Timah  | KJ594718    | KJ708932    | BTSIN295-13 |
| <i>Garcinia intermedia</i>        | Clusiaceae     | BCI          | GQ981745    | HQ331600    | GQ982228    |
| <i>Garcinia madruno</i>           | Clusiaceae     | BCI          | GQ981746    | JQ587259    | GQ982229    |
| <i>Garcinia multiflora</i>        | Clusiaceae     | Nanjenshan   | HQ415192    | n/a         | HQ415541    |
| <i>Garcinia oblongifolia</i>      | Clusiaceae     | Dinghushan   | HQ415193    | n/a         | n/a         |
| <i>Garcinia scortechinii</i>      | Clusiaceae     | Bukit-Timah  | KJ594720    | HQ331607    | BTSIN381-13 |
| <i>Gardenia jasminoides</i>       | Rubiaceae      | Lienhuachih  | KJ688214    | KJ687596    | KJ686866    |
| <i>Gardenia tubifera</i>          | Rubiaceae      | Bukit-Timah  | KJ594722    | KJ708933    | BTSIN449-13 |
| <i>Genipa americana</i>           | Rubiaceae      | Luquillo     | HM446802    | HM446692    | HM446934    |
| <i>Glochidion acuminatum</i>      | Phyllanthaceae | Fushan       | KJ688215    | KJ687598    | KJ686871    |
| <i>Glochidion hypoleucum</i>      | Phyllanthaceae | Bukit-Timah  | KJ594724    | n/a         | BTSIN174-13 |
| <i>Glochidion puberulum</i>       | Phyllanthaceae | Gutianshan   | HQ427128    | HQ427285    | HQ426975    |
| <i>Glochidion wrightii</i>        | Phyllanthaceae | Dinghushan   | HQ415187    | HQ415357    | HQ415536    |
| <i>Gluta wallichii</i>            | Anacardiaceae  | Bukit-Timah  | KJ594726    | KJ708937    | BTSIN201-13 |
| <i>Glycosmis citrifolia</i>       | Rutaceae       | Lienhuachih  | KJ688225    | KJ687602    | KJ686875    |
| <i>Glycosmis parviflora</i>       | Rutaceae       | Dinghushan   | HQ415179    | HQ415350    | HQ415528    |
| <i>Gnetum gnemon</i>              | Gnetaceae      | Bukit-Timah  | AY296534    | n/a         | n/a         |
| <i>Gomphandra quadrifida</i>      | Stemonuraceae  | Bukit-Timah  | KJ594729    | KJ708940    | BTSIN346-13 |
| <i>Gomphia serrata</i>            | Ochnaceae      | Bukit-Timah  | KJ594730    | AB233803    | BTSIN015-13 |
| <i>Goniothalamus macrophyllus</i> | Annonaceae     | Bukit-Timah  | BT-R11      | KJ708941    | BTSIN267-13 |

|                                    |                 |             |          |          |             |
|------------------------------------|-----------------|-------------|----------|----------|-------------|
| <i>Goniothalamus tapis</i>         | Annonaceae      | Bukit-Timah | n/a      | KJ708941 | n/a         |
| <i>Gonystylus confusus</i>         | Thymelaeaceae   | Bukit-Timah | KJ594731 | KJ708943 | BTSIN357-13 |
| <i>Gonzalagunia spicata</i>        | Rubiaceae       | Luquillo    | HM446803 | HM446693 | HM446935    |
| <i>Gordonia axillaris</i>          | Theaceae        | Fushan      | KJ688226 | n/a      | KJ686876    |
| <i>Gordonia singaporeana</i>       | Theaceae        | Bukit-Timah | KJ594733 | KJ708945 | BTSIN142-13 |
| <i>Guapira standleyana</i>         | Nyctaginaceae   | BCI         | GQ981748 | GQ982001 | GQ982231    |
| <i>Guarea bullata</i>              | Meliaceae       | BCI         | JQ592719 | JQ588338 | n/a         |
| <i>Guarea fuzzy</i>                | Meliaceae       | BCI         | GQ981749 | n/a      | GQ982232    |
| <i>Guarea glabra</i>               | Meliaceae       | Luquillo    | HM446804 | HM446694 | HM446936    |
| <i>Guarea grandifolia</i>          | Meliaceae       | BCI         | GQ981750 | GQ982002 | GQ982233    |
| <i>Guarea guidonia</i>             | Meliaceae       | Luquillo    | HM446805 | HM446695 | HM446937    |
| <i>Guatteria caribaea</i>          | Annonaceae      | Luquillo    | HM446806 | HM446696 | HM446938    |
| <i>Guatteria dumetorum</i>         | Annonaceae      | BCI         | GQ981752 | n/a      | GQ982235    |
| <i>Guazuma ulmifolia</i>           | Sterculiaceae   | Luquillo    | HM446807 | GQ982003 | HM446939    |
| <i>Guettarda foliacea</i>          | Rubiaceae       | BCI         | GQ981754 | GQ982004 | GQ982237    |
| <i>Guettarda valenzuelana</i>      | Rubiaceae       | Luquillo    | HM446808 | HM446697 | HM446940    |
| <i>Guioa pubescens</i>             | Sapindaceae     | Bukit-Timah | KJ594735 | KJ708947 | BTSIN411-13 |
| <i>Gymnacranthera farquhariana</i> | Myristicaceae   | Bukit-Timah | KJ594739 | KJ708949 | BTSIN482-13 |
| <i>Gynotroches axillaris</i>       | Rhizophoraceae  | Bukit-Timah | KJ594741 | n/a      | n/a         |
| <i>Hamamelis virginiana</i>        | Hamamelidaceae  | SCBI        | DQ352368 | KJ840926 | EU595863    |
| <i>Hamelia axillaris</i>           | Rubiaceae       | Luquillo    | HM446809 | GQ982006 | HM446941    |
| <i>Hamelia patens</i>              | Rubiaceae       | BCI         | GQ981757 | GQ982007 | GQ982240    |
| <i>Hampea appendiculata</i>        | Malvaceae       | BCI         | GQ981758 | JQ588226 | GQ982241    |
| <i>Hasseltia floribunda</i>        | Salicaceae      | BCI         | GQ981759 | GQ982008 | GQ982242    |
| <i>Heisteria acuminata</i>         | Olacaceae       | BCI         | GQ981760 | GQ982009 | GQ982243    |
| <i>Heisteria concinna</i>          | Olacaceae       | BCI         | GQ981761 | GQ982010 | GQ982244    |
| <i>Heisteria scandens</i>          | Olacaceae       | BCI         | JQ593018 | JQ588534 | BCI-P01     |
| <i>Helicia cochinchinensis</i>     | Proteaceae      | Lienhuachih | KJ688230 | HQ415347 | KJ686880    |
| <i>Helicia formosana</i>           | Proteaceae      | Fushan      | n/a      | KJ687603 | n/a         |
| <i>Helicia renetiensis</i>         | Proteaceae      | Lienhuachih | KJ688232 | KJ687605 | KJ686881    |
| <i>Henriettea fascicularis</i>     | Melastomataceae | Luquillo    | HM446810 | HM446698 | HM446941    |
| <i>Heritiera borneensis</i>        | Malvaceae       | Bukit-Timah | KJ594742 | KJ708951 | BTSIN423-13 |

|                                 |                  |             |          |          |             |
|---------------------------------|------------------|-------------|----------|----------|-------------|
| <i>Heritiera elata</i>          | Malvaceae        | Bukit-Timah | KJ594744 | KJ708952 | BTSIN176-13 |
| <i>Herrania purpurea</i>        | Malvaceae        | BCI         | GQ981762 | GQ982011 | GQ982245    |
| <i>Hibiscus pernambucensis</i>  | Malvaceae        | Luquillo    | HM446811 | HM446699 | HM446943    |
| <i>Hieronyma alchorneoides</i>  | Euphorbiaceae    | BCI         | JQ626093 | GQ982012 | GQ982246    |
| <i>Hirtella americana</i>       | Chrysobalanaceae | BCI         | GQ981763 | n/a      | GQ982247    |
| <i>Hirtella rugosa</i>          | Chrysobalanaceae | Luquillo    | HM446812 | n/a      | HM446944    |
| <i>Hirtella triandra</i>        | Chrysobalanaceae | BCI         | GQ981764 | JQ587241 | GQ982248    |
| <i>Homalium cochinchinense</i>  | Salicaceae       | Dinghushan  | HQ415194 | HQ415362 | HQ415542    |
| <i>Homalium cochinchinensis</i> | Salicaceae       | Lienhuachih | KJ688234 | KJ687606 | KJ686883    |
| <i>Homalium racemosum</i>       | Flacourtiaceae   | Luquillo    | HM446813 | HM446700 | HM446945    |
| <i>Hopea ferrugineum</i>        | Dipterocarpaceae | Bukit-Timah | KJ594745 | n/a      | n/a         |
| <i>Hopea griffithii</i>         | Dipterocarpaceae | Bukit-Timah | n/a      | KJ708954 | BTSIN625-13 |
| <i>Hopea sangal</i>             | Dipterocarpaceae | Bukit-Timah | KJ594747 | KJ708957 | BTSIN058-13 |
| <i>Hovenia acerba</i>           | Rhamnaceae       | Dinghushan  | HQ415232 | HQ415396 | HQ415578    |
| <i>Hovenia trichocarpa</i>      | Rhamnaceae       | Gutianshan  | HQ427241 | HQ427384 | HQ427084    |
| <i>Hura crepitans</i>           | Euphorbiaceae    | BCI         | GQ981765 | GQ982013 | GQ982249    |
| <i>Hybanthus prunifolius</i>    | Violaceae        | BCI         | GQ981766 | GQ982014 | GQ982250    |
| <i>Hydrangea chinensis</i>      | Hydrangeaceae    | Fushan      | KJ688235 | n/a      | KJ686884    |
| <i>Idesia polycarpa</i>         | Salicaceae       | Gutianshan  | HQ427272 | HQ427414 | HQ427115    |
| <i>Idesia polycarpa</i>         | Salicaceae       | Gutianshan  | HQ427272 | HQ427414 | n/a         |
| <i>Ilex aquifolium</i>          | Aquifoliaceae    | Wytham      | FJ395601 | FJ395435 | FN675791    |
| <i>Ilex asprella</i>            | Aquifoliaceae    | Lienhuachih | KJ688236 | KJ687607 | KJ686885    |
| <i>Ilex chapaensis</i>          | Aquifoliaceae    | Dinghushan  | HQ415069 | HQ415254 | HQ415421    |
| <i>Ilex chinensis</i>           | Aquifoliaceae    | Gutianshan  | JF941992 | JF954086 | KF255753    |
| <i>Ilex cochinchinensis</i>     | Aquifoliaceae    | Dinghushan  | HQ415071 | HQ415256 | HQ415423    |
| <i>Ilex elmerrilliana</i>       | Aquifoliaceae    | Gutianshan  | HQ427132 | n/a      | n/a         |
| <i>Ilex ficoidea</i>            | Aquifoliaceae    | Fushan      | KJ688237 | KJ687608 | KJ686886    |
| <i>Ilex formosana</i>           | Aquifoliaceae    | Fushan      | KJ688248 | KJ687619 | KJ686897    |
| <i>Ilex goshiensis</i>          | Aquifoliaceae    | Fushan      | KJ688253 | KJ687624 | KJ686902    |
| <i>Ilex hayataiana</i>          | Aquifoliaceae    | Fushan      | KJ688262 | KJ687633 | KJ686911    |
| <i>Ilex latifolia</i>           | Aquifoliaceae    | Gutianshan  | HQ427134 | HQ427289 | HQ426980    |
| <i>Ilex lonicerifolia</i>       | Aquifoliaceae    | Fushan      | KJ688263 | KJ687634 | KJ686912    |
| <i>Ilex macrocarpa</i>          | Aquifoliaceae    | Dinghushan  | HQ415064 | n/a      | HQ415416    |
| <i>Ilex memecylifolia</i>       | Aquifoliaceae    | Dinghushan  | HQ415065 | HQ415252 | HQ415417    |

|                                 |                 |                  |             |             |             |
|---------------------------------|-----------------|------------------|-------------|-------------|-------------|
| <i>Ilex micrococca</i>          | Aquifoliaceae   | Gutianshan       | HQ427135    | HQ427290    | HQ426981    |
| <i>Ilex opaca</i>               | Aquifoliaceae   | SERC             | EF590536    | GQ248140    | GQ248321    |
| <i>Ilex pubescens</i>           | Aquifoliaceae   | Fushan           | KJ688275    | KJ687646    | KJ686924    |
| <i>Ilex rotunda</i>             | Aquifoliaceae   | Dinghushan       | HQ427138    | HQ415255    | HQ415422    |
| <i>Ilex sideroxyloides</i>      | Aquifoliaceae   | Luquillo         | L01928      | n/a         | n/a         |
| <i>Ilex suaveolens</i>          | Aquifoliaceae   | Gutianshan       | HQ427139    | HQ427293    | HQ426984    |
| <i>Ilex triflora</i>            | Aquifoliaceae   | Dinghushan       | HQ415068    | n/a         | HQ415420    |
| <i>Ilex verticillata</i>        | Aquifoliaceae   | Wabikon<br>Lake  | KJ593485    | KJ592999    | EU359326    |
| <i>Ilex wilsonii</i>            | Aquifoliaceae   | Gutianshan       | HQ427140    | HQ427294    | HQ426985    |
| <i>Illicium lanceolatum</i>     | Schisandraceae  | Gutianshan       | HQ427126    | HQ427283    | HQ426973    |
| <i>Indocalamus longiauritus</i> | Poaceae         | Dinghushan       | HQ415166    | HQ415338    | HQ415515    |
| <i>Inga acuminata</i>           | Fabaceae        | BCI              | GQ982015    | GQ981767    | GQ982251    |
| <i>Inga cocleensis</i>          | Fabaceae        | BCI              | GQ981768    | GQ982016    | GQ982252    |
| <i>Inga goldmanii</i>           | Fabaceae        | BCI              | GQ981769    | GQ982017    | GQ982253    |
| <i>Inga laurina</i>             | Fabaceae        | BCI              | HM446814    | HM446701    | HM446946    |
| <i>Inga marginata</i>           | Fabaceae        | BCI              | GQ981771    | GQ982018    | GQ982255    |
| <i>Inga nobilis</i>             | Fabaceae        | BCI              | GQ981772    | GQ982019    | GQ982256    |
| <i>Inga oerstediana</i>         | Fabaceae        | BCI              | GQ981773    | JQ587681    | GQ982257    |
| <i>Inga pezizifera</i>          | Fabaceae        | BCI              | GQ981774    | GQ982020    | GQ982258    |
| <i>Inga punctata</i>            | Fabaceae        | BCI              | GQ981775    | GQ982021    | GQ982259    |
| <i>Inga ruiziana</i>            | Fabaceae        | BCI              | GQ981776    | GQ982022    | GQ982260    |
| <i>Inga sapindoides</i>         | Fabaceae        | BCI              | GQ981777    | GQ982023    | GQ982261    |
| <i>Inga spectabilis</i>         | Fabaceae        | BCI              | GQ981778    | GQ982024    | GQ982262    |
| <i>Inga thibaudiana</i>         | Fabaceae        | BCI              | GQ981779    | GQ982025    | GQ982263    |
| <i>Inga umbellifera</i>         | Fabaceae        | BCI              | GQ981780    | GQ982026    | GQ982264    |
| <i>Inga vera</i>                | Fabaceae:Mimos. | Luquillo         | HM446815    | HM446702    | HM446947    |
| <i>Irvingia malayana</i>        | Irvingiaceae    | Bukit-Timah      | KJ594753    | KJ708962    | n/a         |
| <i>Itea chinensis</i>           | Iteaceae        | Dinghushan       | HQ415186    | HQ415356    | HQ415535    |
| <i>Itea oblonga</i>             | Iteaceae        | Gutianshan       | HQ427159    | n/a         | n/a         |
| <i>Itea parviflora</i>          | Iteaceae        | Fushan           | KJ688283    | n/a         | n/a         |
| <i>Ixonanthes reticulata</i>    | Ixonanthaceae   | Bukit-Timah      | AB233893    | AB233789    | BT-P10      |
| <i>Ixora chinensis</i>          | Rubiaceae       | Dinghushan       | HQ415123    | HQ415301    | HQ415473    |
| <i>Ixora ferrea</i>             | Rubiaceae       | Luquillo         | HM446816    | HM446703    | HM446948    |
| <i>Ixora javanica</i>           | Rubiaceae       | Bukit-Timah      | KJ594754    | KJ708963    | BTSIN271-13 |
| <i>Jacaranda copaia</i>         | Bignoniaceae    | BCI              | GQ981781    | n/a         | GQ982265    |
| <i>Juglans cinerea</i>          | Juglandaceae    | Wabikon<br>Lake  | HQ590142    | HQ594030    | HQ596735    |
| <i>Juglans mandshurica</i>      | Juglandaceae    | Changbaisha<br>n | CANGB022-14 | CANGB022-15 | CANGB022-16 |

|                                               |                 |              |             |             |             |
|-----------------------------------------------|-----------------|--------------|-------------|-------------|-------------|
| <i>Juglans nigra</i>                          | Juglandaceae    | SCBI         | U00437      | U92851      | HQ596736    |
| <i>Knema cinerea</i>                          | Myristicaceae   | Bukit-Timah  | KJ594758    | KJ708967    | BTSIN199-13 |
| <i>Knema hookeriana</i>                       | Myristicaceae   | Bukit-Timah  | KJ594759    | KJ708968    | BTSIN417-13 |
| <i>Knema laurina</i>                          | Myristicaceae   | Bukit-Timah  | KJ594761    | KJ708970    | BTSIN318-13 |
| <i>Knema patentinervia</i>                    | Myristicaceae   | Bukit-Timah  | KJ594762    | KJ708971    | BTSIN597-13 |
| <i>Koilodepas longifolium</i>                 | Euphorbiaceae   | Bukit-Timah  | KJ594763    | n/a         | BTSIN362-13 |
| <i>Kokoona reflexa</i>                        | Celastraceae    | Bukit-Timah  | KJ594764    | KJ708972    | BTSIN075-13 |
| <i>Koompassia malaccensis</i>                 | Fabaceae        | Bukit-Timah  | KJ594765    | KJ708973    | BTSIN293-13 |
| <i>Lacistema aggregatum</i>                   | Lacistemataceae | BCI          | n/a         | GQ982027    | n/a         |
| <i>Lacmellea panamensis</i>                   | Apocynaceae     | BCI          | GQ981782    | GQ982028    | GQ982266    |
| <i>Laetia procera</i>                         | Salicaceae      | BCI          | HM446817    | HM446704    | HM446949    |
| <i>Laetia thamnia</i>                         | Salicaceae      | BCI          | GQ981784    | GQ982029    | GQ982268    |
| <i>Lafoensia punicifolia</i>                  | Lythraceae      | BCI          | BCI-R01     | GQ982030    | GQ982269    |
| <i>Lagerstroemia subcostata</i>               | Lythraceae      | Fushan       | KJ688287    | n/a         | KJ686933    |
| <i>Larix decidua</i>                          | Pinaceae        | Wytham       | NC_016058   | NC_016058   | NC_016058   |
| <i>Larix gmelinii</i>                         | Pinaceae        | Changbaishan | CANGB023-14 | CANGB023-15 | CANGB023-16 |
| <i>Larix laricina</i>                         | Pinaceae        | Wabikon Lake | KJ593496    | n/a         | n/a         |
| <i>Lasianthus appressihirtus var. maximus</i> | Rubiaceae       | Fushan       | KJ688296    | KJ687656    | KJ686941    |
| <i>Lasianthus bunzanensis</i>                 | Rubiaceae       | Lienhuachih  | KJ688297    | n/a         | KJ686942    |
| <i>Lasianthus curtisii</i>                    | Rubiaceae       | Fushan       | KJ688298    | KJ687657    | KJ686943    |
| <i>Lasianthus cyanocarpus</i>                 | Rubiaceae       | Lienhuachih  | KJ688307    | KJ687666    | KJ686952    |
| <i>Lasianthus fordii</i>                      | Rubiaceae       | Fushan       | KJ688311    | KJ687670    | KJ686956    |
| <i>Lasianthus japonicus</i>                   | Rubiaceae       | Gutianshan   | HQ427196    | HQ427345    | HQ427039    |
| <i>Lasianthus microstachys</i>                | Rubiaceae       | Fushan       | KJ688316    | KJ687675    | KJ686961    |
| <i>Lasianthus obliquinervis</i>               | Rubiaceae       | Lienhuachih  | KJ688325    | KJ687683    | KJ686970    |
| <i>Lasianthus wallichii</i>                   | Rubiaceae       | Nanjenshan   | KJ688779    | KJ687686    | KJ687370    |
| <i>Lepisanthes</i>                            | Sapindaceae     | Bukit-Timah  | KJ594767    | KJ708974    | BTSIN205-13 |

|                                   |                  |             |          |          |             |
|-----------------------------------|------------------|-------------|----------|----------|-------------|
| <i>fruticosa</i>                  |                  |             |          |          |             |
| <i>Lepedeza formosa</i>           | Fabaceae         | Gutianshan  | HQ427143 | n/a      | n/a         |
| <i>Licania hypoleuca</i>          | Chrysobalanaceae | BCI         | GQ981786 | GQ982032 | GQ982271    |
| <i>Licania platypus</i>           | Chrysobalanaceae | BCI         | GQ981787 | GQ982033 | GQ982272    |
| <i>Licania splendens</i>          | Chrysobalanaceae | Bukit-Timah | KJ594768 | KJ708975 | BTSIN474-13 |
| <i>Limlia uraiana</i>             | Fagaceae         | Fushan      | KJ688332 | KJ687690 | KJ686979    |
| <i>Lindackeria laurina</i>        | Achariaceae      | BCI         | GQ981788 | GQ982034 | GQ982273    |
| <i>Lindera aggregata</i>          | Lauraceae        | Gutianshan  | HQ427260 | HQ427402 | HQ427103    |
| <i>Lindera benzoin</i>            | Lauraceae        | SERC        | AY337732 | AJ247169 | AF268788    |
| <i>Lindera chunii</i>             | Lauraceae        | Dinghushan  | HQ415171 | HQ415342 | HQ415520    |
| <i>Lindera communis</i>           | Lauraceae        | Fushan      | KJ688337 | KJ687695 | KJ686984    |
| <i>Lindera glauca</i>             | Lauraceae        | Gutianshan  | HQ427265 | HQ427407 | n/a         |
| <i>Lindera metcalfiana</i>        | Lauraceae        | Dinghushan  | HQ415172 | HQ415343 | HQ415521    |
| <i>Lindera reflexa</i>            | Lauraceae        | Gutianshan  | HQ427264 | HQ427406 | HQ427107    |
| <i>Liquidambar formosana</i>      | Altingiaceae     | Gutianshan  | HQ427164 | HQ427313 | HQ427006    |
| <i>Liquidambar styraciflua</i>    | Altingiaceae     | SERC        | AF119181 | AF133218 | AB445366    |
| <i>Liriodendron tulipifera</i>    | Magnoliaceae     | SERC        | AY008947 | AF123480 | AB021047    |
| <i>Litchi chinensis</i>           | Sapindaceae      | Dinghushan  | HQ415120 | HQ415298 | HQ415470    |
| <i>Lithocarpus amygdalifolius</i> | Fagaceae         | Lienhuachih | KJ688347 | KJ687704 | KJ686993    |
| <i>Lithocarpus glaber</i>         | Fagaceae         | Gutianshan  | HQ427174 | HQ427322 | HQ427015    |
| <i>Lithocarpus gracilis</i>       | Fagaceae         | Bukit-Timah | n/a      | KJ708976 | n/a         |
| <i>Litsea accedens</i>            | Lauraceae        | Bukit-Timah | BT-R12   | KJ708978 | BTSIN660-13 |
| <i>Litsea acuminata</i>           | Lauraceae        | Fushan      | KJ688350 | KJ687706 | KJ686996    |
| <i>Litsea castanea</i>            | Lauraceae        | Bukit-Timah | BT-R13   | KJ708981 | BTSIN390-13 |
| <i>Litsea coreana</i>             | Lauraceae        | Gutianshan  | HQ427263 | HQ427405 | HQ427106    |
| <i>Litsea costalis</i>            | Lauraceae        | Bukit-Timah | KJ594769 | KJ708982 | BTSIN073-13 |
| <i>Litsea cubeba</i>              | Lauraceae        | Lienhuachih | KJ688359 | KJ687710 | KJ687004    |
| <i>Litsea elliptica</i>           | Lauraceae        | Bukit-Timah | KJ594770 | KJ708983 | BTSIN244-13 |
| <i>Litsea elongata</i>            | Lauraceae        | Gutianshan  | HQ427261 | HQ427403 | HQ427104    |
| <i>Litsea firma</i>               | Lauraceae        | Bukit-Timah | KJ594773 | n/a      | n/a         |
| <i>Litsea grandis</i>             | Lauraceae        | Bukit-Timah | KJ594774 | KJ708986 | BT-P11      |
| <i>Litsea hypophaea</i>           | Lauraceae        | Lienhuachih | KJ688361 | KJ687711 | KJ687006    |
| <i>Litsea ridleyi</i>             | Lauraceae        | Bukit-Timah | KJ594775 | KJ708987 | BTSIN204-13 |
| <i>Litsea rotundifolia</i>        | Lauraceae        | Dinghushan  | HQ415128 | HQ415306 | HQ415478    |
| <i>Litsea verticillata</i>        | Lauraceae        | Dinghushan  | HQ415129 | n/a      | HQ415479    |
| <i>Lonchocarpus heptaphyllus</i>  | Fabaceae         | BCI         | GQ981789 | GQ982035 | GQ982274    |



|                                              |                 |              |             |          |             |
|----------------------------------------------|-----------------|--------------|-------------|----------|-------------|
| <i>Lonchocarpus latifolius</i>               | Fabaceae:Papil. | Luquillo     | HM446818    | HM446705 | HM446950    |
| <i>Lonicera praeflorens</i>                  | Caprifoliaceae  | Changbaishan | CANGB024-14 | n/a      | n/a         |
| <i>Lophopetalum pallidum</i>                 | Celastraceae    | Bukit-Timah  | KJ594776    | n/a      | BTSIN068-13 |
| <i>Loropetalum chinensis</i>                 | Hamamelidaceae  | Gutianshan   | HQ427163    | n/a      | n/a         |
| <i>Lozania pittieri</i>                      | Lacistemataceae | BCI          | GQ981790    | n/a      | GQ982275    |
| <i>Ludwigia octovalvis</i>                   | Onagraceae      | Luquillo     | L1022       | n/a      | n/a         |
| <i>Luehea seemanii</i>                       | Malvaceae       | BCI          | GQ981791    | GQ982036 | GQ982276    |
| <i>Lyonia ovalifolia</i>                     | Ericaceae       | Gutianshan   | HQ427150    | HQ427302 | HQ426994    |
| <i>Maackia amurensis</i>                     | Fabaceae        | Changbaishan | CANGB025-14 | n/a      | n/a         |
| <i>Macaranga andamanica</i>                  | Euphorbiaceae   | Dinghushan   | HQ415129    | HQ415380 | HQ415479    |
| <i>Macaranga bancana</i>                     | Euphorbiaceae   | Bukit-Timah  | KJ594777    | n/a      | n/a         |
| <i>Macaranga lowii</i>                       | Euphorbiaceae   | Bukit-Timah  | KJ594780    | n/a      | n/a         |
| <i>Machilus breviflora</i>                   | Lauraceae       | Dinghushan   | HQ415159    | HQ415332 | HQ415508    |
| <i>Machilus chinensis</i>                    | Lauraceae       | Dinghushan   | HQ415162    | HQ415335 | HQ415511    |
| <i>Machilus grijsii</i>                      | Lauraceae       | Dinghushan   | KF569893    | KF740400 | KP095575    |
| <i>Machilus japonica</i> var. <i>kusanoi</i> | Lauraceae       | Fushan       | KJ688368    | KJ687713 | KJ687012    |
| <i>Machilus kwangtungensis</i>               | Lauraceae       | Dinghushan   | HQ415161    | HQ415334 | HQ415510    |
| <i>Machilus pauhoi</i>                       | Lauraceae       | Gutianshan   | HQ427276    | HQ427418 | HQ427119    |
| <i>Machilus phoenicis</i>                    | Lauraceae       | Dinghushan   | HQ415160    | HQ415333 | HQ415509    |
| <i>Machilus robusta</i>                      | Lauraceae       | Dinghushan   | HQ415164    | HQ415336 | HQ415513    |
| <i>Machilus thunbergii</i>                   | Lauraceae       | Fushan       | KJ688372    | KJ687715 | KJ687017    |
| <i>Machilus velutina</i>                     | Lauraceae       | Dinghushan   | HQ415165    | HQ415337 | HQ415514    |
| <i>Machilus zuihoensis</i>                   | Lauraceae       | Fushan       | KJ688384    | KJ687717 | KJ687031    |
| <i>Maclura cochinchinensis</i>               | Moraceae        | Gutianshan   | HQ427219    | HQ427365 | HQ427062    |
| <i>Maclurodendron porteri</i>                | Rutaceae        | Bukit-Timah  | KJ594781    | n/a      | n/a         |
| <i>Macrocnemum roseum</i>                    | Rubiaceae       | BCI          | GQ981792    | GQ982037 | GQ982278    |
| <i>Madhuca malaccensis</i>                   | Sapotaceae      | Bukit-Timah  | KJ594784    | KJ708991 | BTSIN041-13 |
| <i>Maesa japonica</i>                        | Primulaceae     | Fushan       | KJ688389    | KJ687721 | KJ687035    |
| <i>Maesa perlaria</i> var. <i>formosana</i>  | Primulaceae     | Fushan       | KJ688390    | KJ687722 | KJ687036    |
| <i>Maesa ramentacea</i>                      | Primulaceae     | Bukit-Timah  | n/a         | KJ708993 | BTSIN328-13 |

|                               |                 |              |             |             |             |
|-------------------------------|-----------------|--------------|-------------|-------------|-------------|
| <i>Maesa salicifolia</i>      | Primulaceae     | Dinghushan   | HQ415072    | HQ415257    | HQ415424    |
| <i>Magnolia cylindrica</i>    | Magnoliaceae    | Gutianshan   | HQ427278    | HQ427420    | HQ427121    |
| <i>Magnolia paenetaulauma</i> | Magnoliaceae    | Dinghushan   | HQ415131    | HQ415308    | HQ415481    |
| <i>Magnolia splendens</i>     | Magnoliaceae    | Luquillo     | HM446819    | KJ012663    | HM446951    |
| <i>Mahonia bealei</i>         | Berberidaceae   | Gutianshan   | L75871      | n/a         | n/a         |
| <i>Mallotus apelta</i>        | Euphorbiaceae   | Dinghushan   | HQ427129    | HQ427286    | HQ415565    |
| <i>Mallotus japonicus</i>     | Euphorbiaceae   | Fushan       | KJ688398    | AB268027    | KJ686635    |
| <i>Mallotus paniculatus</i>   | Euphorbiaceae   | Fushan       | KJ688404    | HQ415384    | KJ686630    |
| <i>Mallotus penangensis</i>   | Euphorbiaceae   | Bukit-Timah  | KJ594787    | n/a         | n/a         |
| <i>Mallotus philippensis</i>  | Euphorbiaceae   | Lienhuachih  | KJ688410    | HQ415385    | KJ686636    |
| <i>Malpighia romeroana</i>    | Malpighiaceae   | BCI          | GQ981793    | GQ982038    | GQ982279    |
| <i>Malus baccata</i>          | Rosaceae        | Changbaishan | CANGB026-14 | CANGB026-15 | CANGB026-16 |
| <i>Malus leiocalyca</i>       | Rosaceae        | Gutianshan   | HQ427202    | HQ427351    | HQ427045    |
| <i>Malus pumila</i>           | Rosaceae        | Wabikon Lake | KJ593530    | KJ593022    | n/a         |
| <i>Mangifera indica</i>       | Anacardiaceae   | Luquillo     | HM446821    | JQ586473    | HM446953    |
| <i>Manglietia yuyuanensis</i> | Magnoliaceae    | Gutianshan   | HQ427274    | n/a         | n/a         |
| <i>Manilkara bidentata</i>    | Sapotaceae      | Luquillo     | HM446822    | HM446708    | HM446954    |
| <i>Maquira guianensis</i>     | Moraceae        | BCI          | GQ981794    | GQ982039    | GQ982280    |
| <i>Margaritaria nobilis</i>   | Phyllanthaceae  | BCI          | HM446823    | HM446709    | HM446955    |
| <i>Marila laxiflora</i>       | Calophyllaceae  | BCI          | GQ981796    | n/a         | GQ982282    |
| <i>Matayba domingensis</i>    | Sapindaceae     | Luquillo     | HM446824    | HM446710    | HM446956    |
| <i>Matthaea sancta</i>        | Monimiaceae     | Bukit-Timah  | KJ594794    | KJ708998    | BTSIN442-13 |
| <i>Maytenus elongata</i>      | Celastraceae    | Luquillo     | HM446825    | HM446711    | HM446957    |
| <i>Maytenus schippii</i>      | Celastraceae    | BCI          | GQ981797    | GQ982041    | GQ982283    |
| <i>Meiogyne virgata</i>       | Annonaceae      | Bukit-Timah  | KJ594795    | KJ708999    | JX544784    |
| <i>Melastoma candidum</i>     | Melastomataceae | Fushan       | KJ688413    | KP093302    | KJ687041    |
| <i>Melastoma sanguineum</i>   | Melastomataceae | Dinghushan   | HQ415218    | n/a         | HQ415564    |
| <i>Melicope glabra</i>        | Rutaceae        | Bukit-Timah  | KJ594799    | KJ709002    | BTSIN431-13 |
| <i>Melicope pteleifolia</i>   | Rutaceae        | Lienhuachih  | KJ688417    | KJ510924    | KJ687045    |
| <i>Meliosma flexuosa</i>      | Sabiaceae       | Gutianshan   | HQ427214    | HQ427361    | HQ427057    |

|                                  |                 |             |          |          |             |
|----------------------------------|-----------------|-------------|----------|----------|-------------|
| <i>Meliosma fordii</i>           | Sabiaceae       | Dinghushan  | HQ415133 | n/a      | HQ415483    |
| <i>Meliosma herbertii</i>        | Sabiaceae       | Luquillo    | HM446826 | HM446712 | HM446958    |
| <i>Meliosma lanceolata</i>       | Sabiaceae       | Bukit-Timah | KJ594801 | KJ709003 | n/a         |
| <i>Meliosma oldhamii</i>         | Sabiaceae       | Gutianshan  | HQ427213 | HQ427360 | HQ427056    |
| <i>Meliosma rhoifolia</i>        | Sabiaceae       | Lienhuachih | KJ688420 | n/a      | n/a         |
| <i>Meliosma rigida</i>           | Sabiaceae       | Dinghushan  | HQ415132 | HQ415309 | HQ415482    |
| <i>Meliosma squamulata</i>       | Sabiaceae       | Fushan      | KJ688423 | n/a      | KJ687049    |
| <i>Memecylon ligustrifolium</i>  | Melastomataceae | Dinghushan  | HQ415087 | HQ415270 | HQ415438    |
| <i>Memecylon megacarpum</i>      | Melastomataceae | Bukit-Timah | KJ594802 | n/a      | BTSIN151-13 |
| <i>Memecylon minutiflorum</i>    | Melastomataceae | Bukit-Timah | KJ594803 | n/a      | n/a         |
| <i>Memecylon nigrescens</i>      | Melastomataceae | Dinghushan  | HQ415088 | HQ415271 | HQ415439    |
| <i>Mesechites trifidus</i>       | Apocynaceae     | BCI         | AJ419749 | EF456269 | BCI-P02     |
| <i>Mezzettia parviflora</i>      | Annonaceae      | Bukit-Timah | KJ594804 | KJ709004 | BTSIN184-13 |
| <i>Michelia compressa</i>        | Magnoliaceae    | Fushan      | KJ688428 | KJ687727 | KJ687054    |
| <i>Michelia foveolata</i>        | Magnoliaceae    | Dinghushan  | HQ415092 | HQ415275 | HQ415443    |
| <i>Michelia maudiae</i>          | Magnoliaceae    | Dinghushan  | HQ415093 | HQ415276 | HQ415444    |
| <i>Michelia skinneriana</i>      | Magnoliaceae    | Gutianshan  | HQ427275 | n/a      | n/a         |
| <i>Miconia affinis</i>           | Melastomataceae | BCI         | GQ981798 | GQ982042 | GQ982284    |
| <i>Miconia argentea</i>          | Melastomataceae | BCI         | GQ981799 | GQ982043 | GQ982285    |
| <i>Miconia dorsiloba</i>         | Melastomataceae | BCI         | GQ981800 | BCI-M01  | GQ982286    |
| <i>Miconia elata</i>             | Melastomataceae | BCI         | GQ981801 | n/a      | GQ982287    |
| <i>Miconia hondurensis</i>       | Melastomataceae | BCI         | GQ981802 | n/a      | GQ982288    |
| <i>Miconia impetolaris</i>       | Melastomataceae | BCI         | HM446827 | GQ982044 | HM446959    |
| <i>Miconia laevigata</i>         | Melastomataceae | Luquillo    | HM446828 | n/a      | HM446960    |
| <i>Miconia mirabilis</i>         | Melastomataceae | Luquillo    | HM446829 | n/a      | HM446961    |
| <i>Miconia nervosa</i>           | Melastomataceae | BCI         | GQ981804 | n/a      | GQ982290    |
| <i>Miconia prasina</i>           | Melastomataceae | Luquillo    | HM446830 | n/a      | HM446962    |
| <i>Miconia racemosa</i>          | Melastomataceae | Luquillo    | HM446831 | n/a      | HM446963    |
| <i>Miconia tetrandra</i>         | Melastomataceae | Luquillo    | HM446832 | n/a      | HM446964    |
| <i>Microcos blattaefolia</i>     | Malvaceae       | Bukit-Timah | KJ594807 | KJ709007 | BTSIN445-13 |
| <i>Microcos paniculata</i>       | Malvaceae       | Dinghushan  | HQ415136 | HQ415312 | HQ415486    |
| <i>Microdesmis caseariifolia</i> | Pandaceae       | Dinghushan  | HQ415208 | HQ415373 | HQ415555    |

|                                                          |                 |             |          |          |             |
|----------------------------------------------------------|-----------------|-------------|----------|----------|-------------|
| <i>Micropholis garciniifolia</i>                         | Sapotaceae      | Luquillo    | HM446833 | HM446713 | HM446965    |
| <i>Micropholis guyanensis</i>                            | Sapotaceae      | Luquillo    | HM446834 | HM446714 | HM446966    |
| <i>Mischocarpus pentapetalus</i>                         | Sapindaceae     | Dinghushan  | HQ415054 | HQ415242 | HQ415406    |
| <i>Morella cerifera</i>                                  | Myricaceae      | BCI         | AF119179 | EF590411 | EF590715    |
| <i>Morinda seibertii</i>                                 | Rubiaceae       | BCI         | GQ981805 | n/a      | GQ982291    |
| <i>Morus alba</i>                                        | Moraceae        | SERC        | JN407320 | n/a      | GQ435324    |
| <i>Morus rubra</i>                                       | Moraceae        | SERC        | U06812   | n/a      | n/a         |
| <i>Mosannonna garwoodii</i>                              | Annonaceae      | BCI         | GQ981806 | GQ982045 | GQ982292    |
| <i>Mouriri myrtilloides</i>                              | Melastomataceae | BCI         | GQ981807 | n/a      | GQ982293    |
| <i>Myrcia deflexa</i>                                    | Myrtaceae       | Luquillo    | HM446835 | HM446715 | HM446967    |
| <i>Myrcia fallax</i>                                     | Myrtaceae       | Luquillo    | HM446836 | HM446716 | HM446968    |
| <i>Myrcia gatunensis</i>                                 | Myrtaceae       | BCI         | GQ981808 | GQ982046 | GQ982294    |
| <i>Myrcia leptoclada</i>                                 | Myrtaceae       | Luquillo    | HM446837 | HM446717 | HM446969    |
| <i>Myrcia splendens</i>                                  | Myrtaceae       | Luquillo    | HM446838 | HM446718 | HM446970    |
| <i>Myrica esculenta</i>                                  | Myricaceae      | Bukit-Timah | KJ594810 | n/a      | n/a         |
| <i>Myrica rubra</i>                                      | Myricaceae      | Fushan      | KJ688436 | HQ427396 | HQ427096    |
| <i>Myristica cinnamomea</i>                              | Myristicaceae   | Bukit-Timah | KJ594811 | KJ709009 | BTSIN286-13 |
| <i>Myrospermum frutescens</i>                            | Fabaceae        | BCI         | GQ981809 | GQ982047 | GQ982295    |
| <i>Myrsine coriacea</i>                                  | Myrsinaceae     | Luquillo    | HM446839 | n/a      | n/a         |
| <i>Nauclea officinalis</i>                               | Rubiaceae       | Dinghushan  | HQ415201 | n/a      | n/a         |
| <i>Nectandra antillana</i>                               | Lauraceae       | Luquillo    | GQ981812 | n/a      | HM446971    |
| <i>Nectandra cissiflora</i>                              | Lauraceae       | BCI         | GQ981810 | GQ982048 | GQ982296    |
| <i>Nectandra fuzzy</i>                                   | Lauraceae       | BCI         | GQ982049 | GQ981811 | GQ982297    |
| <i>Nectandra lineata</i>                                 | Lauraceae       | BCI         | GQ982050 | GQ981812 | GQ982298    |
| <i>Nectandra purpurea</i>                                | Lauraceae       | BCI         | BCI-R02  | EU153858 | EU153974    |
| <i>Nectandra umbrosa</i>                                 | Lauraceae       | BCI         | GQ981813 | GQ982051 | GQ982299    |
| <i>Neea amplifolia</i>                                   | Nyctaginaceae   | BCI         | GQ981814 | GQ982052 | GQ982300    |
| <i>Neolitsea aciculata</i><br><i>var. variabilissima</i> | Lauraceae       | Fushan      | KJ688441 | KJ687736 | KJ687063    |
| <i>Neolitsea aurata</i>                                  | Lauraceae       | Dinghushan  | HQ415213 | HQ415378 | HQ415560    |
| <i>Neolitsea cambodiana</i>                              | Lauraceae       | Dinghushan  | HQ415211 | HQ415376 | HQ415558    |
| <i>Neolitsea chui</i>                                    | Lauraceae       | Dinghushan  | HQ415210 | HQ415375 | HQ415557    |
| <i>Neolitsea konishii</i>                                | Lauraceae       | Fushan      | KJ688446 | KJ687737 | KJ687072    |
| <i>Neolitsea umbrosa</i>                                 | Lauraceae       | Dinghushan  | HQ415212 | HQ415377 | HQ415559    |
| <i>Neoscortechinia forbesii</i>                          | Euphorbiaceae   | Bukit-Timah | KJ594815 | KJ709013 | BT-P12      |

|                                       |                 |             |          |          |             |
|---------------------------------------|-----------------|-------------|----------|----------|-------------|
| <i>Neoscortechinia kingii</i>         | Euphorbiaceae   | Bukit-Timah | AB267912 | AB268016 | BTSIN649-13 |
| <i>Nephelium chryseum</i>             | Sapindaceae     | Dinghushan  | HQ415181 | HQ415352 | HQ415530    |
| <i>Nephelium costatum</i>             | Sapindaceae     | Bukit-Timah | KJ594817 | KJ709014 | BTSIN465-13 |
| <i>Nephelium lappaceum</i>            | Sapindaceae     | Bukit-Timah | KJ594819 | KJ709016 | BTSIN471-13 |
| <i>Nothaphoebe umbelliflora</i>       | Lauraceae       | Bukit-Timah | KJ594822 | KJ709020 | BTSIN047-13 |
| <i>Nyssa sinensis</i>                 | Cornaceae       | Gutianshan  | HQ427178 | HQ427326 | HQ427019    |
| <i>Nyssa sylvatica</i>                | Cornaceae       | SERC        | AF119178 | GU266599 | JQ280789    |
| <i>Ochanostachys amentacea</i>        | Olacaceae       | Bukit-Timah | KJ594824 | KJ709022 | BT-P13      |
| <i>Ochroma pyramidale</i>             | Bombacaceae     | Luquillo    | HM446840 | HM446719 | GQ982301    |
| <i>Ocotea cernua</i>                  | Lauraceae       | BCI         | GQ981816 | JQ588119 | GQ982302    |
| <i>Ocotea floribunda</i>              | Lauraceae       | Luquillo    | HM446841 | HM446720 | HM446972    |
| <i>Ocotea leucoxylon</i>              | Lauraceae       | Luquillo    | HM446842 | HM446721 | HM446973    |
| <i>Ocotea moschata</i>                | Lauraceae       | Luquillo    | HM446843 | HM446722 | HM446974    |
| <i>Ocotea oblonga</i>                 | Lauraceae       | BCI         | GQ981817 | GQ982053 | GQ982303    |
| <i>Ocotea puberula</i>                | Lauraceae       | BCI         | GQ981818 | GQ982054 | GQ982304    |
| <i>Ocotea sintenisii</i>              | Lauraceae       | Luquillo    | HM446844 | HM446723 | HM446975    |
| <i>Ocotea spathulata</i>              | Lauraceae       | Luquillo    | HM446845 | HM446724 | HM446976    |
| <i>Ocotea whitei</i>                  | Lauraceae       | BCI         | GQ981818 | n/a      | GQ982305    |
| <i>Oenocarpus mapora</i>              | Arecaceae       | BCI         | GQ981819 | n/a      | GQ982306    |
| <i>Oncosperma horridum</i>            | Arecaceae       | Bukit-Timah | KJ594825 | KJ709024 | BTSIN486-13 |
| <i>Oreocnide pedunculata</i>          | Urticaceae      | Fushan      | KJ688452 | n/a      | KJ687073    |
| <i>Ormosia amazonica</i>              | Fabaceae        | BCI         | GQ981820 | n/a      | GQ982307    |
| <i>Ormosia coccinea</i>               | Fabaceae        | BCI         | GQ981821 | GQ982055 | GQ982308    |
| <i>Ormosia fordiana</i>               | Fabaceae:Papil. | Dinghushan  | HQ415096 | HQ415278 | HQ415447    |
| <i>Ormosia formosana</i>              | Fabaceae        | Lienhuachih | KJ688458 | KJ687743 | KJ687078    |
| <i>Ormosia glaberrima</i>             | Fabaceae:Papil. | Dinghushan  | HQ415097 | HQ415279 | HQ415448    |
| <i>Ormosia krugii</i>                 | Fabaceae:Papil. | Luquillo    | HM446846 | HM446725 | HM446977    |
| <i>Ormosia macrocalyx</i>             | Fabaceae        | BCI         | GQ981822 | GQ982056 | GQ982309    |
| <i>Ormosia semicastrata</i>           | Fabaceae:Papil. | Dinghushan  | HQ415098 | HQ415280 | HQ415449    |
| <i>Ormosia semicastrata f pallida</i> | Fabaceae:Papil. | Dinghushan  | HQ415095 | HQ415277 | HQ415446    |
| <i>Orophea creaghii</i>               | Annonaceae      | Bukit-Timah | KJ594826 | KJ709025 | BTSIN443-13 |

|                                          |                  |              |             |          |             |
|------------------------------------------|------------------|--------------|-------------|----------|-------------|
| <i>Osmanthus cooperi</i>                 | Oleaceae         | Gutianshan   | HQ427188    | HQ427336 | HQ427030    |
| <i>Osmanthus matsumuranus</i>            | Oleaceae         | Fushan       | KJ688459    | KJ687744 | KJ687079    |
| <i>Osmelia philippina</i>                | Salicaceae       | Bukit-Timah  | KJ594827    | KJ709026 | BTSIN298-13 |
| <i>Ostrya virginiana</i>                 | Betulaceae       | Wabikon Lake | KJ593568    | KJ593034 | FJ011865    |
| <i>Ouratea lucens</i>                    | Ochnaceae        | BCI          | GQ981823    | n/a      | n/a         |
| <i>Oxandra laurifolia</i>                | Annonaceae       | Luquillo     | HM446847    | HM446726 | HM446978    |
| <i>Pachira quinata</i>                   | Malvaceae        | BCI          | GQ981824    | GQ982057 | GQ982310    |
| <i>Pachira sessilis</i>                  | Malvaceae        | BCI          | BCI-R03     | n/a      | n/a         |
| <i>Padus avium</i>                       | Rosaceae         | Changbaishan | CANGB027-14 | n/a      | n/a         |
| <i>Palaquium impressinervium</i>         | Sapotaceae       | Bukit-Timah  | KJ594829    | n/a      | n/a         |
| <i>Palaquium microphyllum</i>            | Sapotaceae       | Bukit-Timah  | n/a         | KJ709027 | n/a         |
| <i>Palaquium obovatum</i>                | Sapotaceae       | Bukit-Timah  | KJ594830    | KJ709028 | BTSIN351-13 |
| <i>Palaquium oxleyanum</i>               | Sapotaceae       | Bukit-Timah  | KJ594831    | n/a      | n/a         |
| <i>Palicourea guianensis</i>             | Rubiaceae        | BCI          | GQ981825    | GQ982058 | GQ982311    |
| <i>Palicourea riparia</i>                | Rubiaceae        | Luquillo     | HM446848    | HM446727 | HM446979    |
| <i>Pandanus sp.</i>                      | Pandaceae        | Bukit-Timah  | KJ594832    | KJ709029 | n/a         |
| <i>Parartocarpus bracteatus</i>          | Moraceae         | Bukit-Timah  | KJ594833    | n/a      | BTSIN094-13 |
| <i>Parinari argentasericea</i>           | Chrysobalanaceae | Bukit-Timah  | n/a         | KJ709030 | n/a         |
| <i>Parinari oblongifolia</i>             | Chrysobalanaceae | Bukit-Timah  | JQ898743    | KJ709031 | BTSIN672-13 |
| <i>Parishia maingayi</i>                 | Anacardiaceae    | Bukit-Timah  | KJ594834    | KJ709032 | BT-P14      |
| <i>Parishia paucijuga</i>                | Anacardiaceae    | Bukit-Timah  | KJ594835    | KJ709033 | BTSIN105-13 |
| <i>Parkia speciosa</i>                   | Fabaceae         | Bukit-Timah  | KJ594837    | KJ709035 | BTSIN475-13 |
| <i>Pasania hancei var. ternaticupula</i> | Fagaceae         | Fushan       | KJ688466    | KJ687751 | KJ687086    |
| <i>Pasania harlandii</i>                 | Fagaceae         | Fushan       | KJ688474    | KJ687756 | KJ687093    |
| <i>Pasania konishii</i>                  | Fagaceae         | Lienhuachih  | KJ688484    | KJ687760 | KJ687100    |
| <i>Pasania nantoensis</i>                | Fagaceae         | Lienhuachih  | KJ688485    | KJ687761 | KJ687101    |
| <i>Pasania synbalanos</i>                | Fagaceae         | Lienhuachih  | KJ688492    | KJ687765 | KJ687105    |
| <i>Paulownia tomentosa</i>               | Paulowniaceae    | SCBI         | L36447      | AF051997 | JF321288    |
| <i>Payena lucida</i>                     | Sapotaceae       | Bukit-Timah  | KJ594838    | KJ709037 | BTSIN372-13 |
| <i>Pellacalyx</i>                        | Rhizophoraceae   | Bukit-Timah  | KJ594842    | KJ709040 | BTSIN303-13 |

|                                    |                  |              |             |             |             |
|------------------------------------|------------------|--------------|-------------|-------------|-------------|
| <i>saccardianus</i>                |                  |              |             |             |             |
| <i>Pentace triptera</i>            | Malvaceae        | Bukit-Timah  | KJ594844    | KJ709042    | BTSIN210-13 |
| <i>Pentagonia macrophylla</i>      | Rubiaceae        | BCI          | GQ981826    | GQ982059    | GQ982312    |
| <i>Pentaphylax euryoides</i>       | Pentaphylacaceae | Dinghushan   | HQ415203    | HQ415369    | HQ415550    |
| <i>Perebea xanthochyma</i>         | Moraceae         | BCI          | GQ981827    | GQ982060    | GQ982313    |
| <i>Perrottetia arisanensis</i>     | Dipentodontaceae | Fushan       | KJ688496    | KJ687769    | KJ687109    |
| <i>Pertusadina hainanensis</i>     | Rubiaceae        | Gutianshan   | HQ427197    | HQ427346    | HQ427040    |
| <i>Phellodendron amurense</i>      | Rutaceae         | Changbaishan | CANGB028-14 | CANGB028-15 | CANGB028-16 |
| <i>Philadelphus schrenkii</i>      | Hydrangeaceae    | Changbaishan | CANGB029-14 | n/a         | n/a         |
| <i>Photinia beauverdiana</i>       | Rosaceae         | Gutianshan   | HQ427204    | HQ427353    | HQ427047    |
| <i>Photinia glabra</i>             | Rosaceae         | Gutianshan   | HQ427205    | HQ427354    | n/a         |
| <i>Photinia parvifolia</i>         | Rosaceae         | Gutianshan   | HQ427206    | HQ427355    | n/a         |
| <i>Photinia prunifolia</i>         | Rosaceae         | Dinghushan   | HQ415183    | n/a         | HQ415532    |
| <i>Photinia serrulata</i>          | Rosaceae         | Gutianshan   | HQ427207    | n/a         | n/a         |
| <i>Phyllanthus glaucus</i>         | Euphorbiaceae    | Gutianshan   | HQ427130    | n/a         | n/a         |
| <i>Picea abies</i>                 | Pinaceae         | Wytham       | NC_021456   | NC_021456   | NC_021456   |
| <i>Picea glauca</i>                | Pinaceae         | Wabikon Lake | KJ593601    | AF133926    | JX508482    |
| <i>Picea jezoensis</i>             | Pinaceae         | Changbaishan | CANGB030-14 | CANGB030-15 | CANGB030-16 |
| <i>Picea koraiensis</i>            | Pinaceae         | Changbaishan | CANGB031-14 | CANGB031-15 | CANGB031-16 |
| <i>Picea mariana</i>               | Pinaceae         | Wabikon Lake | KJ593605    | EU364794    | JX50849     |
| <i>Picramnia latifolia</i>         | Picramniaceae    | BCI          | GQ981828    | n/a         | GQ982314    |
| <i>Picrasma quassioides</i>        | Simaroubaceae    | Gutianshan   | HQ427179    | HQ427327    | HQ427020    |
| <i>Pieris formosa</i>              | Ericaceae        | Gutianshan   | HQ427148    | HQ427301    | HQ426993    |
| <i>Pieris japonica</i>             | Ericaceae        | Gutianshan   | HQ427151    | HQ427303    | HQ426995    |
| <i>Pimelodendron griffithianum</i> | Euphorbiaceae    | Bukit-Timah  | KJ594847    | n/a         | n/a         |
| <i>Pinanga sp</i>                  | Arecaceae        | Bukit-Timah  | KJ594849    | KJ709045    | n/a         |
| <i>Pinus koraiensis</i>            | Pinaceae         | Changbaishan | CANGB032-14 | CANGB032-15 | CANGB032-16 |
| <i>Pinus massoniana</i>            | Pinaceae         | Dinghushan   | HQ427243    | HQ427386    | HQ427086    |

|                                                       |                 |                  |             |          |             |
|-------------------------------------------------------|-----------------|------------------|-------------|----------|-------------|
| <i>Pinus morrisonicola</i>                            | Pinaceae        | Lienhuachih      | KJ688497    | n/a      | n/a         |
| <i>Pinus strobus</i>                                  | Pinaceae        | Wabikon<br>Lake  | KJ593613    | AY497255 | EU750631    |
| <i>Pinus sylvestris</i> var.<br><i>sylvestrifomis</i> | Pinaceae        | Changbaisha<br>n | CANGB033-14 | n/a      | n/a         |
| <i>Pinus taeda</i>                                    | Pinaceae        | SERC             | AF119177    | AB080928 | KJ661381    |
| <i>Pinus virginiana</i>                               | Pinaceae        | SERC             | AB063379    | AB080923 | JQ512351    |
| <i>Piper aduncum</i>                                  | Piperaceae      | Luquillo         | HM446849    | HM446728 | HM446980    |
| <i>Piper aequale</i>                                  | Piperaceae      | BCI              | GQ981829    | JQ588619 | GQ982315    |
| <i>Piper arboreum</i>                                 | Piperaceae      | BCI              | n/a         | GQ981830 | GQ982316    |
| <i>Piper blattarum</i>                                | Piperaceae      | Luquillo         | HM446850    | HM446729 | HM446981    |
| <i>Piper carrilloanum</i>                             | Piperaceae      | BCI              | GQ981831    | GQ982061 | GQ982320    |
| <i>Piper colonense</i>                                | Piperaceae      | BCI              | GQ981832    | n/a      | n/a         |
| <i>Piper cordulatum</i>                               | Piperaceae      | BCI              | GQ981833    | GQ982062 | GQ982317    |
| <i>Piper glabrescens</i>                              | Piperaceae      | Luquillo         | HM446851    | HM446730 | HM446982    |
| <i>Piper hispidum</i>                                 | Piperaceae      | Luquillo         | HM446852    | DQ882219 | HM446983    |
| <i>Piper<br/>multiplinervium</i>                      | Piperaceae      | BCI              | JQ593229    | JQ588651 | n/a         |
| <i>Piper perlasense</i>                               | Piperaceae      | BCI              | GQ981834    | GQ982063 | GQ982318    |
| <i>Piper reticulatum</i>                              | Piperaceae      | BCI              | GQ981835    | DQ882221 | GQ982319    |
| <i>Piper umbellatum</i>                               | Piperaceae      | Luquillo         | HM446853    | GQ429067 | HM446984    |
| <i>Pisonia subcordata</i>                             | Nyctaginaceae   | Luquillo         | HM446854    | HM446731 | HM446985    |
| <i>Pithecellobium<br/>clypearia</i>                   | Fabaceae:Mimos. | Dinghushan       | HQ415100    | HQ415281 | HQ415451    |
| <i>Pittosporum<br/>glabratum</i>                      | Pittosporaceae  | Dinghushan       | HQ415091    | HQ415274 | HQ415442    |
| <i>Pittosporum<br/>illicioides</i>                    | Pittosporaceae  | Gutianshan       | HQ427157    | HQ427307 | HQ427000    |
| <i>Platycarya<br/>strobilacea</i>                     | Juglandaceae    | Gutianshan       | HQ427158    | HQ427308 | HQ427001    |
| <i>Platymiscium<br/>pinnatum</i>                      | Fabaceae        | BCI              | JQ626063    | GQ982064 | GQ982321    |
| <i>Pleodendron<br/>macranthum</i>                     | Canellaceae     | Luquillo         | HM446855    | HM446732 | HM446986    |
| <i>Pluchea<br/>symphytifolia</i>                      | Asteraceae      | Luquillo         | JQ590700    | n/a      | n/a         |
| <i>Podocarpus nakaii</i>                              | Podocarpaceae   | Lienhuachih      | KJ688679    | n/a      | n/a         |
| <i>Polyalthia glauca</i>                              | Annonaceae      | Bukit-Timah      | KJ594850    | KJ709046 | GQ248372    |
| <i>Polyalthia<br/>macropoda</i>                       | Annonaceae      | Bukit-Timah      | KJ594852    | KJ709047 | n/a         |
| <i>Polyalthia rumphii</i>                             | Annonaceae      | Bukit-Timah      | KJ594854    | KJ709049 | BTSIN103-13 |
| <i>Popowia pisocarpa</i>                              | Annonaceae      | Bukit-Timah      | KJ594857    | KJ709052 | BTSIN453-13 |
| <i>Popowia tomentosa</i>                              | Annonaceae      | Bukit-Timah      | KJ594858    | KJ709053 | BTSIN380-13 |



|                                                      |             |              |             |             |             |
|------------------------------------------------------|-------------|--------------|-------------|-------------|-------------|
| <i>Populus balsamifera</i>                           | Salicaceae  | Wabikon Lake | KJ593626    | KJ593064    | n/a         |
| <i>Populus davidiana</i>                             | Salicaceae  | Changbaishan | CANGB034-14 | n/a         | n/a         |
| <i>Populus koreana</i>                               | Salicaceae  | Changbaishan | CANGB035-14 | n/a         | n/a         |
| <i>Populus tremuloides</i>                           | Salicaceae  | Wabikon Lake | KJ593631    | KJ593068    | n/a         |
| <i>Populus ussuriensis</i>                           | Salicaceae  | Changbaishan | CANGB036-14 | n/a         | n/a         |
| <i>Porterandia anisophylla</i>                       | Rubiaceae   | Bukit-Timah  | KJ594859    | KJ709054    | BTSIN290-13 |
| <i>Posoqueria latifolia</i>                          | Rubiaceae   | BCI          | GQ981837    | GQ982066    | GQ982323    |
| <i>Poulsenia armata</i>                              | Moraceae    | BCI          | GQ981838    | n/a         | GQ982324    |
| <i>Pourouma bicolor</i>                              | Urticaceae  | BCI          | GQ981839    | GQ982067    | GQ982325    |
| <i>Pourthiaea beauverdiana</i> var. <i>notabilis</i> | Rosaceae    | Fushan       | KJ688498    | KJ687770    | KJ686637    |
| <i>Pouteria reticulata</i>                           | Sapotaceae  | BCI          | GQ981841    | JQ589190    | GQ982327    |
| <i>Pouteria stipitata</i>                            | Sapotaceae  | BCI          | GQ981842    | GQ982069    | GQ982328    |
| <i>Premna microphylla</i>                            | Lamiaceae   | Gutianshan   | HQ427183    | HQ427331    | HQ427024    |
| <i>Prestoea montana</i>                              | Arecaceae   | Luquillo     | HM446857    | HM446733    | HM446987    |
| <i>Prioria copaifera</i>                             | Fabaceae    | BCI          | n/a         | n/a         | GQ982329    |
| <i>Prismatomeris glabra</i>                          | Rubiaceae   | Bukit-Timah  | KJ594862    | KJ709057    | BTSIN275-13 |
| <i>Protium confusum</i>                              | Burseraceae | BCI          | GQ981843    | GQ982070    | GQ982330    |
| <i>Protium costaricense</i>                          | Burseraceae | BCI          | GQ981844    | GQ982071    | GQ982331    |
| <i>Protium panamense</i>                             | Burseraceae | BCI          | GQ981845    | n/a         | GQ982332    |
| <i>Protium tenuifolium</i>                           | Burseraceae | BCI          | GQ981846    | n/a         | GQ982333    |
| <i>Prunus avium</i>                                  | Rosaceae    | Wytham       | HQ235394    | FJ899109    | HQ188741    |
| <i>Prunus persica</i>                                | Rosaceae    | SCBI         | NC_014697   | NC_014697   | NC_014697   |
| <i>Prunus polystachya</i>                            | Rosaceae    | Bukit-Timah  | KJ594865    | KJ709060    | BTSIN251-13 |
| <i>Prunus schneideriana</i>                          | Rosaceae    | Gutianshan   | HQ427209    | HQ427356    | HQ427052    |
| <i>Prunus serotina</i>                               | Rosaceae    | Wabikon Lake | KJ593640    | KJ593077    | DQ006222    |
| <i>Prunus serrulata</i>                              | Rosaceae    | Changbaishan | CANGB037-14 | CANGB037-15 | CANGB037-16 |
| <i>Prunus spinosa</i>                                | Rosaceae    | Wytham       | n/a         | HQ235276    | FR865110    |
| <i>Prunus spinulosa</i>                              | Rosaceae    | Gutianshan   | HQ427210    | HQ427357    | HQ427053    |
| <i>Prunus virginiana</i>                             | Rosaceae    | Wabikon Lake | KJ593643    | KJ593079    | GU562409    |

|                                    |                 |             |          |          |             |
|------------------------------------|-----------------|-------------|----------|----------|-------------|
| <i>Pseudobombax septenatum</i>     | Malvaceae       | BCI         | GQ981847 | GQ982072 | GQ982334    |
| <i>Pseudolmedia spuria</i>         | Moraceae        | Luquillo    | HM446858 | HM446734 | HM446988    |
| <i>Pseudosamanea guachapele</i>    | Fabaceae        | BCI         | JQ591565 | n/a      | AF524983    |
| <i>Psidium friedrichsthalianum</i> | Myrtaceae       | BCI         | GQ981848 | GQ982073 | GQ982335    |
| <i>Psychotria acuminata</i>        | Rubiaceae       | BCI         | GQ981849 | GQ982074 | GQ982336    |
| <i>Psychotria asiatica</i>         | Rubiaceae       | Dinghushan  | HQ415119 | HQ415297 | HQ415469    |
| <i>Psychotria berteriana</i>       | Rubiaceae       | Luquillo    | HM446859 | HM446735 | HM446989    |
| <i>Psychotria brachiata</i>        | Rubiaceae       | Luquillo    | HM446860 | HM446736 | HM446990    |
| <i>Psychotria chagrensis</i>       | Rubiaceae       | BCI         | GQ981850 | GQ982075 | GQ982337    |
| <i>Psychotria cyanococca</i>       | Rubiaceae       | BCI         | GQ981851 | n/a      | GQ982338    |
| <i>Psychotria deflexa</i>          | Rubiaceae       | Luquillo    | HM446861 | HM446737 | HM446991    |
| <i>Psychotria graciliflora</i>     | Rubiaceae       | BCI         | GQ981853 | GQ982077 | GQ982340    |
| <i>Psychotria grandis</i>          | Rubiaceae       | Luquillo    | HM446862 | HM446738 | HM446992    |
| <i>Psychotria hoffmannseggiana</i> | Rubiaceae       | BCI         | GQ981853 | n/a      | n/a         |
| <i>Psychotria horizontalis</i>     | Rubiaceae       | BCI         | GQ981855 | JQ589738 | GQ982342    |
| <i>Psychotria limonensis</i>       | Rubiaceae       | BCI         | GQ981856 | GQ982079 | GQ982343    |
| <i>Psychotria marginata</i>        | Rubiaceae       | BCI         | GQ981857 | GQ982080 | GQ982344    |
| <i>Psychotria psychotriifolia</i>  | Rubiaceae       | BCI         | GQ981858 | n/a      | GQ982345    |
| <i>Psychotria racemosa</i>         | Rubiaceae       | BCI         | GQ981859 | JQ589019 | GQ982346    |
| <i>Psychotria rubra</i>            | Rubiaceae       | Lienhuachih | KJ688513 | n/a      | KJ687121    |
| <i>Psychotria tenuifolia</i>       | Rubiaceae       | BCI         | GQ981860 | GQ982081 | GQ982347    |
| <i>Psydrax dicoccos</i>            | Rubiaceae       | Dinghushan  | HQ415205 | HQ415371 | HQ415571    |
| <i>Pternandra coerulea</i>         | Melastomataceae | Bukit-Timah | n/a      | KJ709061 | BTSIN167-13 |
| <i>Pterocarpus belizensis</i>      | Fabaceae        | BCI         | HM446863 | HM446739 | HM446993    |

|                                   |                 |              |             |             |             |
|-----------------------------------|-----------------|--------------|-------------|-------------|-------------|
| <i>Pterocarpus officinalis</i>    | Fabaceae:Papil. | Luquillo     | HM446863    | HM446739    | HM446993    |
| <i>Pterocarpus rohrii</i>         | Fabaceae        | BCI          | GQ981862    | GQ982083    | GQ982349    |
| <i>Pterospermum heterophyllum</i> | Malvaceae       | Dinghushan   | HQ415057    | HQ415245    | HQ415409    |
| <i>Pygeum topengii</i>            | Rosaceae        | Dinghushan   | HQ415196    | DQ851230    | HQ415544    |
| <i>Pyrenaria shinkoensis</i>      | Theaceae        | Fushan       | KJ688514    | KJ687781    | KJ687122    |
| <i>Quararibea asterolepis</i>     | Malvaceae       | BCI          | n/a         | n/a         | GQ982350    |
| <i>Quararibea turbinata</i>       | Malvaceae       | Luquillo     | HM446864    | HM446740    | HM446994    |
| <i>Quassia amara</i>              | Simaroubaceae   | BCI          | GQ981863    | n/a         | GQ982351    |
| <i>Quercus alba</i>               | Fagaceae        | SCBI         | LM652853    | LM652870    | LM652974    |
| <i>Quercus argentata</i>          | Fagaceae        | Bukit-Timah  | KJ594869    | KJ709063    | BTSIN341-13 |
| <i>Quercus marilandica</i>        | Fagaceae        | SCBI         | KJ773806    | KJ773054    | SCBI-P01    |
| <i>Quercus michauxii</i>          | Fagaceae        | SCBI         | KJ773807    | KJ773064    | SCBI-P02    |
| <i>Quercus mongolica</i>          | Fagaceae        | Changbaishan | CANGB038-14 | CANGB038-15 | CANGB038-16 |
| <i>Quercus muehlenbergii</i>      | Fagaceae        | SCBI         | KF683161    | KR062090    | SCBI-P03    |
| <i>Quercus phillyraeoides</i>     | Fagaceae        | Gutianshan   | HQ427176    | HQ427324    | HQ427012    |
| <i>Quercus robur</i>              | Fagaceae        | Wytham       | KF683161    | FJ185056    | FJ395542    |
| <i>Quercus rubra</i>              | Fagaceae        | Wabikon Lake | KJ593650    | KJ593082    | EU750515    |
| <i>Quercus serrata</i>            | Fagaceae        | Gutianshan   | HQ427171    | HQ427319    | HQ427012    |
| <i>Quercus velutina</i>           | Fagaceae        | SCBI         | KJ593653    | KJ593084    | SCBI-P06    |
| <i>Radermachera sinica</i>        | Bignoniaceae    | Lienhuachih  | KJ688522    | KJ687788    | KJ687129    |
| <i>Randia armata</i>              | Rubiaceae       | BCI          | GQ981864    | GQ982084    | GQ982352    |
| <i>Randia cochinchinensis</i>     | Rubiaceae       | Fushan       | KJ688526    | KJ687792    | KJ687133    |
| <i>Rauvolfia littoralis</i>       | Apocynaceae     | BCI          | GQ981865    | GQ982085    | n/a         |
| <i>Rauvolfia nitida</i>           | Apocynaceae     | Luquillo     | DQ660663    | n/a         | n/a         |
| <i>Reevesia formosana</i>         | Malvaceae       | Lienhuachih  | KJ688530    | n/a         | n/a         |
| <i>Reevesia pycnantha</i>         | Malvaceae       | Gutianshan   | HQ427249    | HQ427392    | HQ427092    |
| <i>Reevesia thyrsoides</i>        | Malvaceae       | Dinghushan   | HQ415190    | HQ415360    | HQ415539    |
| <i>Rhamnus crenata</i>            | Rhamnaceae      | Gutianshan   | HQ427242    | HQ427385    | HQ427085    |
| <i>Rhamnus ussuriensis</i>        | Rhamnaceae      | Changbaishan | CANGB039-14 | n/a         | n/a         |
| <i>Rhaphiolepis indica</i>        | Rosaceae        | Dinghushan   | HQ415182    | HQ415353    | HQ415531    |

|                                                    |                 |              |             |             |             |
|----------------------------------------------------|-----------------|--------------|-------------|-------------|-------------|
| <i>Rhaphiolepis indica</i><br><i>var. tashiroi</i> | Rosaceae        | Lienhuachih  | KJ688531    | KJ687796    | KJ687137    |
| <i>Rheedia</i><br><i>portoricensis</i>             | Malpighiaceae   | Luquillo     | AF518377    | n/a         | M446995     |
| <i>Rhodamnia cinerea</i>                           | Myrtaceae       | Bukit-Timah  | KJ594870    | KJ709064    | BTSIN149-13 |
| <i>Rhododendron</i><br><i>henryi</i>               | Ericaceae       | Dinghushan   | HQ415074    | HQ415258    | HQ415425    |
| <i>Rhododendron</i><br><i>henryi var. dunnii</i>   | Ericaceae       | Dinghushan   | HQ415075    | HQ415259    | HQ415426    |
| <i>Rhododendron</i><br><i>latoucheae</i>           | Ericaceae       | Gutianshan   | HQ427145    | HQ427298    | HQ426990    |
| <i>Rhododendron</i><br><i>leptosanthum</i>         | Ericaceae       | Fushan       | KJ688538    | KJ687798    | KJ687140    |
| <i>Rhododendron</i><br><i>mariae</i>               | Ericaceae       | Dinghushan   | HQ415073    | n/a         | n/a         |
| <i>Rhododendron</i><br><i>mariesii</i>             | Ericaceae       | Lienhuachih  | KJ688539    | HQ427300    | KJ687146    |
| <i>Rhododendron</i><br><i>ovatum</i>               | Ericaceae       | Gutianshan   | HQ427144    | HQ427297    | HQ426989    |
| <i>Rhododendron</i><br><i>simsii</i>               | Ericaceae       | Dinghushan   | HQ427146    | HQ427299    | HQ415427    |
| <i>Rhodomyrtus</i><br><i>tomentosa</i>             | Myrtaceae       | Dinghushan   | HQ415191    | HQ415361    | HQ415540    |
| <i>Rhus hypoleuca</i>                              | Anacardiaceae   | Gutianshan   | n/a         | HQ427342    | n/a         |
| <i>Rhus succedanea</i>                             | Anacardiaceae   | Fushan       | KJ688544    | KJ687802    | KJ687150    |
| <i>Ribes</i><br><i>mandshuricum</i>                | Grossulariaceae | Changbaishan | CANGB040-14 | CANGB040-15 | CANGB040-16 |
| <i>Rinorea sylvatica</i>                           | Violaceae       | BCI          | GQ981866    | GQ982086    | GQ982353    |
| <i>Robinia</i><br><i>pseudoacacia</i>              | Fabaceae        | SCBI         | DQ006096    | HM049518    | DQ006187    |
| <i>Rondeletia</i><br><i>portoricensis</i>          | Rubiaceae       | Luquillo     | HM446866    | HM446741    | HM446996    |
| <i>Rosa macrophylla</i>                            | Rosaceae        | Changbaishan | CANGB041-14 | n/a         | n/a         |
| <i>Rosenbergiodendron</i><br><i>formosum</i>       | Rubiaceae       | BCI          | GQ981867    | GQ982087    | GQ982354    |
| <i>Roystonea</i><br><i>borinquena</i>              | Arecaceae       | Luquillo     | HM446867    | HM446742    | HM446997    |
| <i>Rubus</i><br><i>alleghehiensis</i>              | Rosaceae        | SCBI         | EU676983    | EU749375    | EU750524    |
| <i>Rubus chingii</i>                               | Rosaceae        | Gutianshan   | HQ427211    | HQ427358    | HQ427054    |
| <i>Rubus pensilvanicus</i>                         | Rosaceae        | SCBI         | EU676983    | n/a         | n/a         |
| <i>Rubus</i>                                       | Rosaceae        | SCBI         | JN965825    | SCBI-M01    | SCBI-P04    |

|                               |               |              |             |          |             |
|-------------------------------|---------------|--------------|-------------|----------|-------------|
| <i>phoenicolasius</i>         |               |              |             |          |             |
| <i>Ryania speciosa</i>        | Salicaceae    | BCI          | HM446868    | n/a      | n/a         |
| <i>Sambucus canadensis</i>    | Adoxaceae     | SCBI         | HQ590258    | HQ593429 | HQ596833    |
| <i>Sambucus nigra</i>         | Adoxaceae     | Wytham       | KJ773864    | FN668836 | FN675824    |
| <i>Sambucus racemosa</i>      | Adoxaceae     | Wabikon Lake | KJ593677    | KJ593099 | n/a         |
| <i>Sambucus williamsii</i>    | Adoxaceae     | Changbaishan | CANGB042-14 | n/a      | n/a         |
| <i>Samyda dodecandra</i>      | Salicaceae    | Luquillo     | HM446868    | HM446743 | HM446998    |
| <i>Sandoricum beccarianum</i> | Meliaceae     | Bukit-Timah  | KJ594872    | KJ709065 | n/a         |
| <i>Santiria griffithii</i>    | Burseraceae   | Bukit-Timah  | KJ594874    | KJ709067 | BTSIN594-13 |
| <i>Santiria rubiginosa</i>    | Burseraceae   | Bukit-Timah  | BTSIN655-13 | n/a      | BTSIN655-13 |
| <i>Santiria tomentosa</i>     | Burseraceae   | Bukit-Timah  | KJ594877    | KJ709070 | BTSIN622-13 |
| <i>Sapindus mukorossi</i>     | Sapindaceae   | Lienhuachih  | KJ688552    | KJ687809 | KJ687158    |
| <i>Sapium broadleaf</i>       | Euphorbiaceae | BCI          | GQ982088    | GQ981868 | GQ982355    |
| <i>Sapium glandulosum</i>     | Euphorbiaceae | BCI          | GQ981869    | GQ982089 | GQ982356    |
| <i>Sapium laurocerasus</i>    | Euphorbiaceae | Luquillo     | HM446869    | n/a      | HM446999    |
| <i>Saprosma glomerulatum</i>  | Rubiaceae     | Bukit-Timah  | KJ594878    | KJ709071 | BTSIN273-13 |
| <i>Sarcosperma laurinum</i>   | Sapotaceae    | Dinghushan   | HQ415158    | HQ415331 | HQ415507    |
| <i>Sarcotheca griffithii</i>  | Oxalidaceae   | Bukit-Timah  | BT-R14      | KJ709072 | BTSIN603-13 |
| <i>Sassafras albidum</i>      | Lauraceae     | SCBI         | GU271217    | EU153879 | EF491223    |
| <i>Sassafras tzumu</i>        | Lauraceae     | Gutianshan   | HQ427277    | HQ427419 | HQ427120    |
| <i>Saurauia tristyla</i>      | Actinidiaceae | Dinghushan   | n/a         | EU310435 | n/a         |
| <i>Scaphium macropodum</i>    | Malvaceae     | Bukit-Timah  | KJ594879    | KJ709073 | BTSIN339-13 |
| <i>Schefflera heptaphylla</i> | Araliaceae    | Dinghushan   | HQ415082    | KP093353 | HQ415433    |
| <i>Schefflera morototoni</i>  | Araliaceae    | Luquillo     | HM446870    | HM446744 | HM447000    |
| <i>Schefflera octophylla</i>  | Araliaceae    | Fushan       | KJ688559    | KJ687814 | KJ687161    |
| <i>Schima superba</i>         | Theaceae      | Lienhuachih  | KJ688568    | KJ687823 | KJ687170    |
| <i>Schizolobium parahyba</i>  | Fabaceae      | BCI          | GQ981870    | GQ982090 | GQ982357    |
| <i>Schoepfia chinensis</i>    | Olacaceae     | Dinghushan   | HQ415145    | HQ415320 | HQ415495    |
| <i>Schoepfia jasminodora</i>  | Olacaceae     | Dinghushan   | HQ415146    | HQ415321 | HQ415496    |

|                                 |                  |              |             |             |             |
|---------------------------------|------------------|--------------|-------------|-------------|-------------|
| <i>Scleropyrum wallichianum</i> | Santalaceae      | Bukit-Timah  | KJ594880    | KJ709074    | BTSIN272-13 |
| <i>Scorodocarpus borneensis</i> | Olacaceae        | Bukit-Timah  | KJ594882    | KJ709075    | BTSIN266-13 |
| <i>Senna dariensis</i>          | Fabaceae         | BCI          | GQ981871    | GQ982091    | GQ982358    |
| <i>Shorea assamica</i>          | Dipterocarpaceae | Bukit-Timah  | n/a         | KJ709077    | BTSIN581-13 |
| <i>Shorea curtisii</i>          | Dipterocarpaceae | Bukit-Timah  | BTSIN109-13 | n/a         | BTSIN109-13 |
| <i>Shorea gratissima</i>        | Dipterocarpaceae | Bukit-Timah  | KJ594886    | n/a         | BTSIN358-13 |
| <i>Shorea ochrophloia</i>       | Dipterocarpaceae | Bukit-Timah  | BT-R15      | KJ709081    | BTSIN668-13 |
| <i>Shorea ovalis</i>            | Dipterocarpaceae | Bukit-Timah  | n/a         | KJ709082    | BTSIN628-13 |
| <i>Shorea pauciflora</i>        | Dipterocarpaceae | Bukit-Timah  | n/a         | KJ709083    | BTSIN580-13 |
| <i>Simarouba amara</i>          | Simaroubaceae    | BCI          | HM446871    | JQ589560    | HM447001    |
| <i>Sindora coriacea</i>         | Fabaceae         | Bukit-Timah  | KJ594887    | KJ709084    | BTSIN179-13 |
| <i>Siparuna guianensis</i>      | Siparunaceae     | BCI          | GQ981872    | GQ982092    | GQ982360    |
| <i>Siparuna pauciflora</i>      | Siparunaceae     | BCI          | GQ981873    | GQ982093    | GQ982361    |
| <i>Sloanea berteroaana</i>      | Elaeocarpaceae   | Luquillo     | HM446872    | HM446745    | HM447002    |
| <i>Sloanea sinensis</i>         | Elaeocarpaceae   | Dinghushan   | HQ427152    | n/a         | n/a         |
| <i>Sloanea terniflora</i>       | Elaeocarpaceae   | BCI          | GQ981874    | GQ982094    | GQ982362    |
| <i>Socratea exorrhiza</i>       | Arecaceae        | BCI          | GQ981875    | GQ982095    | GQ982363    |
| <i>Solanum asperum</i>          | Solanaceae       | BCI          | GQ981876    | GQ982096    | GQ982364    |
| <i>Solanum circinatum</i>       | Solanaceae       | BCI          | GQ981877    | GQ982097    | GQ982365    |
| <i>Solanum hayesii</i>          | Solanaceae       | BCI          | GQ981878    | GQ982098    | GQ982366    |
| <i>Solanum lepidotum</i>        | Solanaceae       | BCI          | GQ981879    | GQ982099    | GQ982367    |
| <i>Solanum rugosum</i>          | Solanaceae       | Luquillo     | JQ594175    | JQ589269    | n/a         |
| <i>Sorbaria sorbifolia</i>      | Rosaceae         | Changbaishan | CANGB043-14 | CANGB043-15 | CANGB043-16 |
| <i>Sorbus alnifolia</i>         | Rosaceae         | Changbaishan | CANGB044-14 | n/a         | n/a         |
| <i>Sorbus folgneri</i>          | Rosaceae         | Gutianshan   | HQ427212    | HQ427359    | HQ427055    |
| <i>Sorbus pohuashanensis</i>    | Rosaceae         | Changbaishan | CANGB045-14 | n/a         | n/a         |
| <i>Sorocea affinis</i>          | Moraceae         | BCI          | GQ981880    | GQ982100    | GQ982368    |
| <i>Spachea membranacea</i>      | Malpighiaceae    | BCI          | GQ981881    | GQ982101    | GQ982369    |
| <i>Spathodea campanulata</i>    | Bignoniaceae     | Luquillo     | HM446873    | HM446746    | HM447003    |
| <i>Spiraea chamaedryfolia</i>   | Rosaceae         | Changbaishan | CANGB046-14 | n/a         | n/a         |
| <i>Spondias mombin</i>          | Anacardiaceae    | BCI          | GQ981882    | AY594480    | GQ982370    |
| <i>Spondias radlkoferi</i>      | Anacardiaceae    | BCI          | GQ981883    | n/a         | GQ982371    |
| <i>Stemmadenia grandiflora</i>  | Apocynaceae      | BCI          | GQ981884    | GQ982102    | GQ982372    |

|                                                |               |             |             |          |             |
|------------------------------------------------|---------------|-------------|-------------|----------|-------------|
| <i>Stemonurus malaccensis</i>                  | Stemonuraceae | Bukit-Timah | BTSIN154-13 | n/a      | BTSIN154-13 |
| <i>Sterculia apetala</i>                       | Malvaceae     | BCI         | GQ981885    | GQ982103 | GQ982373    |
| <i>Sterculia coccinea</i>                      | Malvaceae     | Bukit-Timah | KJ594892    | KJ709089 | BTSIN477-13 |
| <i>Sterculia lanceolata</i>                    | Malvaceae     | Dinghushan  | HQ415135    | HQ415311 | HQ415485    |
| <i>Sterculia parviflora</i>                    | Malvaceae     | Bukit-Timah | KJ594896    | KJ709092 | BTSIN289-13 |
| <i>Sterculia rubiginosa</i>                    | Malvaceae     | Bukit-Timah | KJ594897    | KJ709093 | n/a         |
| <i>Stereospermum fimbriatum</i>                | Bignoniaceae  | Bukit-Timah | BT-R16      | KJ709094 | BTSIN584-13 |
| <i>Streblus elongatus</i>                      | Moraceae      | Bukit-Timah | BTSIN085-13 | n/a      | BTSIN085-13 |
| <i>Strombosia ceylanica</i>                    | Olacaceae     | Bukit-Timah | KJ594898    | KJ709095 | n/a         |
| <i>Stylogyne turbacensis</i>                   | Primulaceae   | BCI         | GQ981886    | GQ982104 | GQ982374    |
| <i>Styrax dasyanthus</i>                       | Styracaceae   | Gutianshan  | HQ427123    | HQ427280 | HQ426970    |
| <i>Styrax formosanus</i>                       | Styracaceae   | Fushan      | KJ688573    | KJ687826 | KJ687175    |
| <i>Styrax odoratissimus</i>                    | Styracaceae   | Gutianshan  | HQ427125    | HQ427282 | HQ426972    |
| <i>Styrax suberifolius</i>                     | Styracaceae   | Dinghushan  | HQ427124    | HQ427281 | HQ415402    |
| <i>Swartzia simplex</i>                        | Fabaceae      | BCI         | GQ981887    | GQ982105 | n/a         |
| <i>Swartzia simplex var. grandiflora</i>       | Fabaceae      | BCI         | GQ981887    | GQ982105 | n/a         |
| <i>Swartzia simplex var. ochracea</i>          | Fabaceae      | BCI         | GQ981887    | GQ982105 | n/a         |
| <i>Swietenia macrophylla</i>                   | Meliaceae     | Luquillo    | HM446874    | HM446747 | HM447004    |
| <i>Swintonia schwenckei</i>                    | Anacardiaceae | Bukit-Timah | KJ594901    | n/a      | BTSIN436-13 |
| <i>Symphonia globulifera</i>                   | Clusiaceae    | BCI         | GQ981889    | GQ429061 | GQ982376    |
| <i>Symplocos adenopus</i>                      | Symplocaceae  | Dinghushan  | HQ415169    | HQ415340 | HQ415518    |
| <i>Symplocos adinandrifolia var. theifolia</i> | Symplocaceae  | Lienhuachih | KJ688585    | KJ687835 | KJ687187    |
| <i>Symplocos anomala</i>                       | Symplocaceae  | Gutianshan  | HQ427233    | n/a      | n/a         |
| <i>Symplocos caudata</i>                       | Symplocaceae  | Fushan      | KJ688586    | KJ687836 | KJ687188    |
| <i>Symplocos glauca</i>                        | Symplocaceae  | Fushan      | KJ688592    | KJ687842 | KJ687194    |
| <i>Symplocos heishanensis</i>                  | Symplocaceae  | Fushan      | KJ688599    | FS-M01   | KJ687201    |
| <i>Symplocos lancifolia</i>                    | Symplocaceae  | Dinghushan  | HQ415167    | HQ415339 | HQ415516    |
| <i>Symplocos</i>                               | Symplocaceae  | Luquillo    | HM446875    | AY630657 | HM447005    |

|                                           |              |              |             |          |             |
|-------------------------------------------|--------------|--------------|-------------|----------|-------------|
| <i>martinicensis</i>                      |              |              |             |          |             |
| <i>Symplocos morrisonicola</i>            | Symplocaceae | Lienhuachih  | KJ688604    | KJ687849 | KJ687204    |
| <i>Symplocos paniculata</i>               | Symplocaceae | Gutianshan   | HQ427234    | HQ427378 | HQ427077    |
| <i>Symplocos setchuensis</i>              | Symplocaceae | Fushan       | KJ688608    | KJ687853 | KJ687208    |
| <i>Symplocos sonoharae</i>                | Symplocaceae | Fushan       | KJ688613    | n/a      | KJ687213    |
| <i>Symplocos stellaris</i>                | Symplocaceae | Gutianshan   | HQ427236    | HQ427379 | HQ427078    |
| <i>Symplocos sumuntia</i>                 | Symplocaceae | Gutianshan   | HQ427232    | HQ427377 | HQ427075    |
| <i>Symplocos theophrastifolia</i>         | Symplocaceae | Nanjenshan   | KJ688847    | KJ687959 | KJ687437    |
| <i>Symplocos wikstroemiifolia</i>         | Symplocaceae | Fushan       | KJ688623    | KJ687866 | KJ687222    |
| <i>Syringa reticulata subsp amurensis</i> | Oleaceae     | Changbaishan | CANGB047-14 | n/a      | n/a         |
| <i>Syringa wolfii</i>                     | Oleaceae     | Changbaishan | CANGB048-14 | n/a      | n/a         |
| <i>Syzygium acuminatissimum</i>           | Myrtaceae    | Dinghushan   | HQ415209    | HQ415374 | HQ415556    |
| <i>Syzygium brittle</i>                   | Myrtaceae    | Bukit-Timah  | n/a         | KJ709097 | n/a         |
| <i>Syzygium buxifolirm</i>                | Myrtaceae    | Gutianshan   | HQ427244    | HQ427387 | HQ427087    |
| <i>Syzygium championii</i>                | Myrtaceae    | Dinghushan   | HQ415142    | HQ415318 | HQ415492    |
| <i>Syzygium duthieanum</i>                | Myrtaceae    | Bukit-Timah  | KJ594903    | KJ709098 | BT-P15      |
| <i>Syzygium filiforme</i>                 | Myrtaceae    | Bukit-Timah  | BT-R17      | KJ709099 | BTSIN620-13 |
| <i>Syzygium filiforme</i>                 | Myrtaceae    | Bukit-Timah  | n/a         | KJ709099 | BTSIN620-13 |
| <i>Syzygium formosanum</i>                | Myrtaceae    | Fushan       | KJ688630    | KJ687869 | KJ687227    |
| <i>Syzygium grande</i>                    | Myrtaceae    | Bukit-Timah  | n/a         | KJ709101 | n/a         |
| <i>Syzygium hancei</i>                    | Myrtaceae    | Dinghushan   | HQ415140    | HQ415316 | HQ415490    |
| <i>Syzygium jambos</i>                    | Myrtaceae    | Luquillo     | HM446876    | HM446748 | HM447006    |
| <i>Syzygium levinei</i>                   | Myrtaceae    | Dinghushan   | HQ415137    | HQ415313 | HQ415487    |
| <i>Syzygium linocieroideum</i>            | Myrtaceae    | Bukit-Timah  | BTSIN633-13 | n/a      | BTSIN633-13 |
| <i>Syzygium nigricans</i>                 | Myrtaceae    | Bukit-Timah  | KJ594909    | KJ709107 | BT-P16      |
| <i>Syzygium oblongifolium</i>             | Myrtaceae    | Bukit-Timah  | n/a         | n/a      | n/a         |
| <i>Syzygium palembanicum</i>              | Myrtaceae    | Bukit-Timah  | n/a         | KJ709108 | n/a         |
| <i>Syzygium pauper</i>                    | Myrtaceae    | Bukit-Timah  | n/a         | KJ709109 | n/a         |



|                                     |              |              |           |           |             |
|-------------------------------------|--------------|--------------|-----------|-----------|-------------|
| <i>Syzygium pendens</i>             | Myrtaceae    | Bukit-Timah  | n/a       | KJ709110  | n/a         |
| <i>Syzygium pseudoformosum</i>      | Myrtaceae    | Bukit-Timah  | KJ594910  | KJ709111  | BTSIN422-13 |
| <i>Syzygium rehderianum</i>         | Myrtaceae    | Dinghushan   | HQ415139  | HQ415315  | HQ415489    |
| <i>Syzygium ridleyi</i>             | Myrtaceae    | Bukit-Timah  | KJ594912  | KJ709116  | n/a         |
| <i>Syzygium singaporense</i>        | Myrtaceae    | Bukit-Timah  | KJ594913  | KJ709117  | n/a         |
| <i>Syzygium subdecussatum</i>       | Myrtaceae    | Bukit-Timah  | n/a       | KJ709118  | BTSIN123-13 |
| <i>Syzygium zeylanicum</i>          | Myrtaceae    | Bukit-Timah  | KJ594914  | n/a       | n/a         |
| <i>Tabebuia guayacan</i>            | Bignoniaceae | BCI          | GQ981890  | GQ982107  | GQ982377    |
| <i>Tabebuia heterophylla</i>        | Bignoniaceae | Luquillo     | HM446877  | HQ384521  | HM447007    |
| <i>Tabebuia rosea</i>               | Bignoniaceae | BCI          | GQ981891  | GQ982108  | GQ982378    |
| <i>Tabernaemontana arborea</i>      | Apocynaceae  | BCI          | GQ981892  | GQ982109  | GQ982379    |
| <i>Tachigali versicolor</i>         | Fabaceae     | BCI          | GQ981893  | n/a       | GQ982380    |
| <i>Talisia croatii</i>              | Sapindaceae  | BCI          | GQ981894  | n/a       | GQ982381    |
| <i>Tarenna costata</i>              | Rubiaceae    | Bukit-Timah  | KJ594915  | KJ709119  | BTSIN429-13 |
| <i>Tarenna mollissima</i>           | Rubiaceae    | Dinghushan   | HQ427200  | HQ427349  | HQ415548    |
| <i>Taxus baccata</i>                | Taxaceae     | Wytham       | NC_020321 | NC_020321 | NC_020321   |
| <i>Teijsmanniodendron coriaceum</i> | Lamiaceae    | Bukit-Timah  | KJ594916  | KJ709120  | BTSIN120-13 |
| <i>Terminalia amazonia</i>          | Combretaceae | BCI          | GQ981895  | n/a       | GQ982382    |
| <i>Terminalia citrina</i>           | Combretaceae | Bukit-Timah  | n/a       | n/a       | n/a         |
| <i>Terminalia oblonga</i>           | Combretaceae | BCI          | GQ981896  | n/a       | GQ982383    |
| <i>Tetradium glabrifolium</i>       | Rutaceae     | Fushan       | KJ688636  | KJ687871  | KJ687232    |
| <i>Tetragastris balsamifera</i>     | Burseraceae  | Luquillo     | HM446878  | HM446749  | HM447008    |
| <i>Tetragastris panamensis</i>      | Burseraceae  | BCI          | GQ428579  | n/a       | GQ982384    |
| <i>Tetrathylacium johansenii</i>    | Salicaceae   | BCI          | GQ981898  | GQ982110  | GQ982385    |
| <i>Theobroma cacao</i>              | Malvaceae    | BCI          | GQ981897  | GQ982111  | GQ982386    |
| <i>Thevetia ahouai</i>              | Apocynaceae  | BCI          | GQ981899  | GQ982112  | GQ982387    |
| <i>Thuja occidentalis</i>           | Cupressaceae | Wabikon Lake | KJ593720  | KJ661406  | KJ661394    |
| <i>Tilia americana</i>              | Malvaceae    | Wabikon Lake | KJ593722  | KJ593130  | HQ596866    |

|                                  |               |              |             |          |          |
|----------------------------------|---------------|--------------|-------------|----------|----------|
| <i>Tilia amurensis</i>           | Malvaceae     | Changbaishan | CANGB049-14 | n/a      | n/a      |
| <i>Tilia endochrysea</i>         | Malvaceae     | Gutianshan   | HQ427156    | HQ427306 | n/a      |
| <i>Tilia mandshurica</i>         | Malvaceae     | Changbaishan | CANGB050-14 | n/a      | n/a      |
| <i>Tocoyena pittieri</i>         | Rubiaceae     | BCI          | GQ981900    | GQ982113 | GQ982388 |
| <i>Toxicodendron succedaneum</i> | Anacardiaceae | Dinghushan   | HQ427194    | HQ427343 | n/a      |
| <i>Toxicodendron sylvestri</i>   | Anacardiaceae | Dinghushan   | HQ415143    | HQ415319 | HQ415493 |
| <i>Trattinnickia aspera</i>      | Burseraceae   | BCI          | GQ981901    | GQ982114 | GQ982389 |
| <i>Trema cannabina</i>           | Rosaceae      | Lienhuachih  | KJ688640    | KJ687875 | KJ687238 |
| <i>Trema micrantha</i>           | Ulmaceae      | Luquillo     | KJ082620    | KJ012809 | GQ982390 |
| <i>Trema tomentosa</i>           | Ulmaceae      | Dinghushan   | HQ415174    | HQ415345 | HQ415523 |
| <i>Triadica cochinchinensis</i>  | Euphorbiaceae | Dinghushan   | HQ415199    | HQ415366 | HQ415547 |
| <i>Tricalysia dubia</i>          | Rubiaceae     | Fushan       | KJ688647    | KJ687881 | KJ687244 |
| <i>Trichanthera gigantea</i>     | Acanthaceae   | BCI          | GQ981903    | GQ982116 | GQ982391 |
| <i>Trichilia pallida</i>         | Meliaceae     | Luquillo     | HM446879    | HM446750 | HM447009 |
| <i>Trichilia tuberculata</i>     | Meliaceae     | BCI          | GQ981905    | n/a      | GQ982393 |
| <i>Trichospermum galeottii</i>   | Malvaceae     | BCI          | JQ594273    | n/a      | n/a      |
| <i>Trigonostemon longifolius</i> | Euphorbiaceae | Bukit-Timah  | KJ594921    | KJ709124 | n/a      |
| <i>Triomma malaccensis</i>       | Burseraceae   | Bukit-Timah  | KJ594922    | KJ709125 | n/a      |
| <i>Triplaris cumingiana</i>      | Polygonaceae  | BCI          | GQ981906    | GQ982118 | GQ982394 |
| <i>Trophis caucana</i>           | Moraceae      | BCI          | GQ981907    | GQ982119 | GQ982395 |
| <i>Trophis racemosa</i>          | Moraceae      | BCI          | GQ981908    | GQ982120 | GQ982396 |
| <i>Tsuga canadensis</i>          | Pinaceae      | Wabikon Lake | KJ593735    | JQ512502 | JQ512378 |
| <i>Turpinia occidentalis</i>     | Staphyleaceae | Luquillo     | HM446880    | HM446751 | HM447010 |
| <i>Tutcheria microcarpa</i>      | Theaceae      | Gutianshan   | HQ427231    | HQ427376 | HQ427387 |
| <i>Ulmus americana</i>           | Ulmaceae      | Wabikon Lake | KJ593739    | KJ593141 | n/a      |
| <i>Ulmus davidiana</i>           | Ulmaceae      | Changbaishan | CANGB051-14 | n/a      | n/a      |
| <i>Ulmus laciniata</i>           | Ulmaceae      | Changbaishan | CANGB052-14 | n/a      | n/a      |

|                               |                  | n            |             |          |             |
|-------------------------------|------------------|--------------|-------------|----------|-------------|
| <i>Ulmus rubra</i>            | Ulmaceae         | SCBI         | KC539680    | KC539611 | SCBI-P05    |
| <i>Unonopsis pittieri</i>     | Annonaceae       | BCI          | GQ981910    | GQ982122 | GQ982398    |
| <i>Urera baccifera</i>        | Urticaceae       | Luquillo     | HM446881    | HM446752 | HM447011    |
| <i>Urophyllum glabrum</i>     | Rubiaceae        | Bukit-Timah  | KJ594924    | KJ709127 | BTSIN206-13 |
| <i>Urophyllum hirsutum</i>    | Rubiaceae        | Bukit-Timah  | KJ594925    | KJ709128 | BT-P17      |
| <i>Vaccinium bracteatum</i>   | Ericaceae        | Fushan       | KJ688660    | KP093519 | KJ687256    |
| <i>Vaccinium randaiense</i>   | Ericaceae        | Lienhuachih  | KJ688664    | n/a      | KJ687261    |
| <i>Vachellia melanoceras</i>  | Fabaceae         | BCI          | GQ981912    | GQ982124 | GQ982400    |
| <i>Vatica odorata</i>         | Dipterocarpaceae | Bukit-Timah  | AB925379    | KJ709131 | BTSIN624-13 |
| <i>Vatica ridleyana</i>       | Dipterocarpaceae | Bukit-Timah  | KJ594928    | KJ709132 | BTSIN416-13 |
| <i>Verbesina gigantea</i>     | Asteraceae       | BCI          | JQ590731    | JQ586939 | n/a         |
| <i>Vernicia montana</i>       | Euphorbiaceae    | Gutianshan   | HQ427131    | HQ427287 | HQ426977    |
| <i>Viburnum acerifolium</i>   | Adoxaceae        | SCBI         | DQ006079    | n/a      | DQ006166    |
| <i>Viburnum acerifolium</i>   | Caprifoliaceae   | SCBI         | KJ593749    | HQ591557 | KJ795522    |
| <i>Viburnum burejaeticum</i>  | Caprifoliaceae   | Changbaishan | CANGB053-14 | n/a      | n/a         |
| <i>Viburnum erosum</i>        | Caprifoliaceae   | Gutianshan   | HQ427216    | HQ427362 | HQ427059    |
| <i>Viburnum formosanum</i>    | Adoxaceae        | Fushan       | KJ688668    | n/a      | KJ687265    |
| <i>Viburnum luzonicum</i>     | Adoxaceae        | Lienhuachih  | KJ688669    | KP094047 | KJ687266    |
| <i>Viburnum odoratissimum</i> | Adoxaceae        | Dinghushan   | HQ415114    | HQ415292 | HQ415464    |
| <i>Viburnum prunifolium</i>   | Adoxaceae        | SCBI         | DQ006080    | KP089365 | DQ006167    |
| <i>Viburnum sargentii</i>     | Adoxaceae        | Changbaishan | CANGB054-14 | n/a      | n/a         |
| <i>Viburnum sempervirens</i>  | Adoxaceae        | Gutianshan   | HQ427217    | HQ427363 | HQ427060    |
| <i>Viola multiflora</i>       | Myristicaceae    | BCI          | GQ981913    | GQ982125 | GQ982401    |
| <i>Viola nobilis</i>          | Myristicaceae    | BCI          | GQ981914    | GQ982126 | GQ982402    |
| <i>Viola sebifera</i>         | Myristicaceae    | BCI          | GQ981915    | n/a      | n/a         |
| <i>Vismia baccifera</i>       | Hypericaceae     | BCI          | GQ981916    | n/a      | GQ982403    |
| <i>Vismia billbergiana</i>    | Hypericaceae     | BCI          | GQ981917    | GQ982127 | GQ982404    |
| <i>Vitex divaricata</i>       | Verbenaceae      | Luquillo     | U78716      | n/a      | HM447012    |
| <i>Vitex quinata</i>          | Verbenaceae      | Dinghushan   | HQ415126    | HQ415304 | HQ415476    |

|                                 |                |             |             |          |             |
|---------------------------------|----------------|-------------|-------------|----------|-------------|
| <i>Walsura chrysogyne</i>       | Meliaceae      | Bukit-Timah | KJ594932    | KJ709133 | BTSIN450-13 |
| <i>Weigela japonica</i>         | Caprifoliaceae | Gutianshan  | HQ427218    | HQ427364 | HQ427061    |
| <i>Wendlandia formosana</i>     | Rubiaceae      | Fushan      | KJ688671    | KJ687895 | KJ687269    |
| <i>Wendlandia uvariifolia</i>   | Rubiaceae      | Lienhuachih | KJ688677    | n/a      | KJ687277    |
| <i>Wikstroemia indica</i>       | Thymelaeaceae  | Dinghushan  | HQ415147    | HQ415322 | HQ415497    |
| <i>Wikstroemia monnula</i>      | Thymelaeaceae  | Gutianshan  | HQ427215    | n/a      | n/a         |
| <i>Wikstroemia nutans</i>       | Thymelaeaceae  | Dinghushan  | HQ415148    | n/a      | HQ415498    |
| <i>Xanthophyllum amoenum</i>    | Polygalaceae   | Bukit-Timah | BTSIN557-13 | n/a      | BTSIN557-13 |
| <i>Xanthophyllum ellipticum</i> | Polygalaceae   | Bukit-Timah | BTSIN141-13 | n/a      | BTSIN141-13 |
| <i>Xanthophyllum eurhynchum</i> | Polygalaceae   | Bukit-Timah | KJ594935    | KJ709135 | BTSIN310-13 |
| <i>Xanthophyllum griffithii</i> | Polygalaceae   | Bukit-Timah | KJ594936    | n/a      | BTSIN350-13 |
| <i>Xanthophyllum hainanense</i> | Polygalaceae   | Dinghushan  | HQ415112    | HQ415290 | HQ415462    |
| <i>Xerospermum noronhianum</i>  | Sapindaceae    | Bukit-Timah | KJ594938    | KJ709136 | BTSIN062-13 |
| <i>Xylopi caudata</i>           | Annonaceae     | Bukit-Timah | KJ594940    | KJ709137 | BTSIN464-13 |
| <i>Xylopi macrantha</i>         | Annonaceae     | BCI         | n/a         | n/a      | GQ982406    |
| <i>Xylopi malayana</i>          | Annonaceae     | Bukit-Timah | BTSIN190-13 | n/a      | BTSIN190-13 |
| <i>Xylosma oligandra</i>        | Salicaceae     | BCI         | GQ981919    | GQ982129 | GQ982407    |
| <i>Xylosma racemosa</i>         | Salicaceae     | Gutianshan  | HQ427273    | n/a      | n/a         |
| <i>Xylosma schwaneckeana</i>    | Salicaceae     | Luquillo    | HM446882    | HM446753 | HM447013    |
| <i>Zanthoxylum ailanthoides</i> | Rutaceae       | Lienhuachih | KJ688678    | KJ687897 | KJ687278    |
| <i>Zanthoxylum avicennae</i>    | Rutaceae       | Dinghushan  | HQ415109    | HQ415288 | HQ415459    |
| <i>Zanthoxylum ekmanii</i>      | Rutaceae       | BCI         | GQ981920    | GQ982130 | GQ982408    |
| <i>Zanthoxylum juniperinum</i>  | Rutaceae       | BCI         | GQ981921    | BCI-M03  | GQ982409    |
| <i>Zanthoxylum martinicense</i> | Rutaceae       | Luquillo    | HM446883    | HM446754 | HM447014    |
| <i>Zanthoxylum myriacanthum</i> | Rutaceae       | Dinghushan  | HQ415108    | HQ415287 | HQ415458    |
| <i>Zanthoxylum panamense</i>    | Rutaceae       | BCI         | n/a         | GQ981922 | GQ982410    |

|                              |            |     |          |          |          |
|------------------------------|------------|-----|----------|----------|----------|
| <i>Zanthoxylum setulosum</i> | Rutaceae   | BCI | GQ981923 | GQ982131 | GQ982411 |
| <i>Zuelania guidonia</i>     | Salicaceae | BCI | GQ981924 | n/a      | GQ982412 |
